# Supplementary material
Source: Research Square preprint supplement (doi:10.21203/rs.3.rs-9464666/v1)
Supplement: Supplementary file 1 [file 2e574b1b7c956c7049d02748.xlsx]

## Sheet: Form Responses 1
Timestamp	Your gender	Your age	Your education level	Your department and class where you are studying	The city you live in	Are you using productive artificial intelligence tools?	Are you using a text-based AI tool?	Which text-based AI tool do you prefer most often?	Are you using an image-based AI tool?	Which image-based AI tool do you prefer?	Are you using a voice-based AI tool?	Which voice-based AI tool do you prefer?	How often do you use generative AI tools (such as ChatGPT, Midjourney)?	Please indicate your frequency of use for generative AI tools. [ChatGPT]	Please indicate your frequency of use for generative AI tools. [Gemini]	Please indicate your frequency of use for generative AI tools. [DeepSeek]	Please indicate your frequency of use for generative AI tools. [Grok]	Please indicate your frequency of use for productive AI tools. [Copilot]	Please indicate your frequency of use for generative AI tools. [Perplexity]	Please indicate your frequency of use for generative AI tools. [Midjourney]	Please indicate your frequency of use for generative AI tools. [Dall-E]	Please indicate your frequency of use for generative AI tools. [Flux]	Please indicate your frequency of use for generative AI tools. [Kling]	Please indicate your frequency of use for generative AI tools. [Sora]	Please indicate your frequency of use for generative AI tools. [Runway ML]	When was the last time you used a generative AI tool?	Are you paying for productive AI tools?	How much are you paying for productive AI tools?	In which areas are you using productive AI tools?	How proficient do you feel when using generative AI tools?	To what extent have generative AI tools become indispensable for you?	The following statements measure generative AI literacy. Answer each statement considering the generative AI tool you use most frequently. [I can distinguish between intelligent (AI-using) and non-intelligent tools.]	The following statements measure generative AI literacy. Answer each statement considering the generative AI tool you use most frequently. [I can identify the technology used in generative AI applications and products.]	The following statements measure generative AI literacy. Answer each statement considering the generative AI tool you use most frequently. [I can skillfully use generative AI applications or products to help me with my daily tasks.]	The following statements measure generative AI literacy. Answer each statement considering the generative AI tool you use most frequently. [I can use generative AI applications or products to increase work efficiency.]	The following statements measure generative AI literacy. Answer these statements considering the generative AI tool you use most frequently. [After using it for a while, I can evaluate the capabilities and limitations of a generative AI application or product.]	The following statements measure generative AI literacy. Answer each statement considering the generative AI tool you use most frequently. [I can choose a suitable solution from among the various solutions provided by generative AI.]	The following statements measure generative AI literacy. Answer each statement considering the generative AI tool you use most frequently. [I can choose the most suitable product from among various generative AI applications for different tasks.]	The following statements measure generative AI literacy. Answer each statement considering the generative AI tool you use most frequently. [I always adhere to ethical principles when using generative AI applications.]	The following statements measure generative AI literacy. Answer each statement considering the generative AI tool you use most frequently. [I pay no attention to privacy and information security issues when using generative AI applications or products.]	The following statements measure generative AI literacy. Answer each statement considering the generative AI tool you use most frequently. [I am always wary of the misuse of generative AI technology.]	The following statements measure the acceptance of generative artificial intelligence. Answer each statement considering the generative AI tool you use most frequently. [I am interested in using AI systems in my daily life.]	The following statements measure the acceptance of generative artificial intelligence. Answer each statement considering the generative AI tool you use most frequently. [Artificial intelligence has many useful applications.]	The following statements measure the acceptance of generative artificial intelligence. Answer each statement considering the generative AI tool you use most frequently. [AI is exciting.]	The following statements measure the adoption of generative artificial intelligence. Answer each statement considering the generative AI tool you use most frequently. [Artificial intelligence could create new economic opportunities for this country.]	The following statements measure the acceptance of generative artificial intelligence. Answer each statement considering the generative AI tool you use most frequently. [I would like to use artificial intelligence in my work.]	The following statements measure the acceptance of generative artificial intelligence. Answer each statement considering the generative AI tool you use most frequently. [An AI-powered software/robot can perform many routine tasks better than a human.]	The following statements measure acceptance of generative AI. Answer each statement considering the generative AI tool you use most frequently. [I am impressed by what AI can do.]	The following statements measure acceptance of generative artificial intelligence. Answer each statement considering the generative AI tool you use most frequently. [Artificial intelligence may have positive effects on human well-being.]
2025-05-03 22:03:51	Male		Bachelor’s Master’s degree		Konya	Yes, I use it.	Yes, I use it.	ChatGPT, DeepSeek, Grok	Yes, I use it.	Midjourney, Flux, Runway ML, Kling	Yes, I use it.	Elevenlabs	4	I use it very often.	I rarely use it.	I use it occasionally.	I use it occasionally.	I rarely use it.	I use it occasionally.	I use it frequently.	I use it occasionally.	I use it very often.	I use it very often.	I rarely use it.		Today	5	20 USD	Content Creation (text, visuals, audio), Business/Professional Purposes, Daily Tasks (calendar, email, suggestions, etc.), Entertainment	I am very competent.	Important	I agree	I agree	I absolutely agree.	I absolutely agree.	I agree	I absolutely agree.	I agree	I'm undecided.	I'm undecided.	I agree	I absolutely agree.	I absolutely agree.	I absolutely agree.	I absolutely agree.	I absolutely agree.	I agree	I agree	I agree
2025-05-03 22:26:14	Woman		Master’s degree	Medical Genetics USA - Graduate	Konya	Yes, I use it.	Yes, I use it.	ChatGPT, Gemini	No, I don't use it.		No, I don't use it.		3	I use it occasionally.	I rarely use it.											In the last week	4	24 USD	Education/Learning, Content Creation (text, visual, audio), Business/Professional Purposes	I am competent	Moderately important	I agree	I'm undecided.	I agree	I absolutely agree.	I absolutely agree.	I agree	I agree	I absolutely agree.	I completely disagree.	I absolutely agree.	I agree	I agree	I agree	I absolutely agree.	I absolutely agree.	I'm undecided.	I agree	I agree
2025-05-03 22:34:32	Male		Master’s degree	genetic	Konya	Yes, I use it.	Yes, I use it.	ChatGPT	No, I don't use it.		No, I don't use it.		3	I use it frequently.	I never use it.	I never use it.	I never use it.	I never use it.	I never use it.	I never use it.	I never use it.	I never use it.	I never use it.	I never use it.		In the last week	3	10 USD	Education/Learning, Content Creation (text, visuals, audio), Business/Professional Purposes, Daily Tasks (calendar, email, suggestions, etc.)	I am competent	Moderately important	I absolutely agree.	I agree	I agree	I agree	I agree	I agree	I agree	I'm undecided.	I'm undecided.	I agree	I agree	I agree	I agree	I agree	I agree	I agree	I agree	I agree
2025-05-03 22:42:04	Woman		Bachelor’s Master’s degree	Biotechnology - 2nd Year	Konya	Yes, I use it.	Yes, I use it.	ChatGPT	No, I don't use it.		No, I don't use it.		5	I use it very often.	I use it occasionally.	I use it occasionally.	I never use it.	I never use it.	I never use it.	I never use it.	I never use it.	I never use it.	I never use it.	I never use it.		Today	1	0	Education/Learning, Content Creation (text, visuals, audio)	I have an intermediate level of proficiency.	Important	I agree	I agree	I agree	I absolutely agree.	I agree	I absolutely agree.	I absolutely agree.	I agree	I disagree.	I absolutely agree.	I absolutely agree.	I absolutely agree.	I absolutely agree.	I agree	I absolutely agree.	I absolutely agree.	I absolutely agree.	I absolutely agree.
2025-05-04 20:25:04	Woman		Bachelor’s Master’s degree	First Aid and Emergency Care Class 1	Adana	Yes, I use it.	Yes, I use it.	ChatGPT	No, I don't use it.		No, I don't use it.		2	I rarely use it.	I rarely use it.	I never use it.	I never use it.	I never use it.	I never use it.	I never use it.	I never use it.	I never use it.	I never use it.	I never use it.		In the last month	1	0	Education / Learning	I have an intermediate level of proficiency.	It's not very important.	I agree	I'm undecided.	I'm undecided.	I agree	I'm undecided.	I agree	I agree	I agree	I completely disagree.	I agree	I disagree.	I'm undecided.	I agree	I agree	I agree	I disagree.	I'm undecided.	I agree
2025-05-04 20:34:16	Woman		Bachelor’s Master’s degree	Preschool Education - 4th Year	Adana	Yes, I use it.	Yes, I use it.	ChatGPT	No, I don't use it.		No, I don't use it.		3	I use it occasionally.	I never use it.	I never use it.	I never use it.	I never use it.	I never use it.	I never use it.	I never use it.	I never use it.	I never use it.	I never use it.		In the last month	1	0 TL	Education/Learning, Work/Professional Purposes, Entertainment	I have an intermediate level of proficiency.	It's not very important.	I agree	I agree	I agree	I agree	I agree	I agree	I agree	I agree	I completely disagree.	I absolutely agree.	I agree	I agree	I agree	I agree	I agree	I'm undecided.	I agree	I'm undecided.
2025-05-04 20:59:02	Woman		Bachelor’s Master’s degree	Child Development, 3rd year	Adana	Yes, I use it.	Yes, I use it.	ChatGPT	No, I don't use it.		No, I don't use it.		5	I use it very often.												Today	1		Daily tasks (calendar, email, suggestions, etc.), entertainment.	I am very competent.	It's not very important.	I absolutely agree.	I completely disagree.	I absolutely agree.	I'm undecided.	I agree	I absolutely agree.	I disagree.	I absolutely agree.	I completely disagree.	I absolutely agree.	I agree	I agree	I agree	I'm undecided.	I disagree.	I absolutely agree.	I agree	I agree
2025-05-04 23:07:05	Male		Master’s degree	Graph-2	Konya	Yes, I use it.	Yes, I use it.	ChatGPT, Gemini, DeepSeek, Grok, Copilot	Yes, I use it.	Midjourney, Dall-E, Flux, Leonardo.ai, Kling	Yes, I use it.	Elevenlabs, Suno	5	I use it very often.	I use it occasionally.	I use it occasionally.	I use it frequently.			I use it occasionally.	I use it occasionally.	I use it occasionally.	I use it occasionally.	I use it occasionally.		Today	1		Education/Learning, Content Creation (text, visual, audio), Business/Professional Purposes,	I am very competent.	Important	I absolutely agree.	I absolutely agree.	I absolutely agree.	I absolutely agree.	I agree	I absolutely agree.	I absolutely agree.	I absolutely agree.	I completely disagree.	I absolutely agree.	I absolutely agree.	I absolutely agree.	I absolutely agree.	I absolutely agree.	I absolutely agree.	I absolutely agree.	I absolutely agree.	I absolutely agree.
2025-05-04 23:17:31	Woman		Master’s degree	Biotechnology - Graduate	Konya	Yes, I use it.	Yes, I use it.	ChatGPT, Gemini	No, I don't use it.		No, I don't use it.		3	I use it frequently.	I use it frequently.	I never use it.	I never use it.	I never use it.	I never use it.	I never use it.	I never use it.	I never use it.	I never use it.	I never use it.		In the last week	1		Education/Learning, Work/Professional Purposes, Daily Tasks (calendar, email, suggestions, etc.)	I am competent	Moderately important	I agree	I disagree.	I agree	I absolutely agree.	I absolutely agree.	I'm undecided.	I agree	I absolutely agree.	I completely disagree.	I agree	I agree	I agree	I absolutely agree.	I absolutely agree.	I absolutely agree.	I disagree.	I'm undecided.	I agree
2025-05-04 23:18:39	Woman		Bachelor’s Master’s degree	Gastronomy graduate	Konya	Yes, I use it.	Yes, I use it.	ChatGPT	Yes, I use it.	Midjourney, Dall-E, Flux, Runway ML, Kling	Yes, I use it.	Elevenlabs	4	I use it very often.			I use it frequently.				I use it occasionally.		I use it occasionally.			Today	4	500	Content Creation (text, visuals, audio), Business/Professional Purposes, Daily Tasks (calendar, email, suggestions, etc.)	I have some competence.	Important	I absolutely agree.	I agree	I agree	I absolutely agree.	I'm undecided.	I absolutely agree.	I agree	I completely disagree.	I disagree.	I disagree.	I absolutely agree.	I absolutely agree.	I absolutely agree.	I absolutely agree.	I absolutely agree.	I'm undecided.	I absolutely agree.	I agree
2025-05-04 23:27:12	Male		Bachelor’s Master’s degree	Space Sciences and Technologies	Antalya	Yes, I use it.	Yes, I use it.	ChatGPT	Yes, I use it.	Midjourney, Leonardo.ai	No, I don't use it.		5	I use it very often.	I use it occasionally.	I use it occasionally.	I never use it.	I never use it.	I never use it.	I use it occasionally.	I never use it.	I never use it.	I never use it.	I never use it.		In the last week	1		Education/Learning, Content Creation (text, visuals, audio)	I have an intermediate level of proficiency.	It's not very important.	I agree	I completely disagree.	I agree	I absolutely agree.	I absolutely agree.	I absolutely agree.	I absolutely agree.	I absolutely agree.	I completely disagree.	I absolutely agree.	I agree	I agree	I agree	I agree	I agree	I agree	I agree	I agree
2025-05-04 23:28:29	Woman		Master’s degree		Konya	Yes, I use it.	Yes, I use it.	ChatGPT, Gemini	No, I don't use it.		No, I don't use it.		4	I use it frequently.	I use it occasionally.	I never use it.	I never use it.	I never use it.	I never use it.	I never use it.	I never use it.	I never use it.	I never use it.	I never use it.		Today	3		Education/Learning, Work/Professional Purposes	I have an intermediate level of proficiency.	Moderately important	I disagree.	I disagree.	I agree	I agree	I agree	I agree	I absolutely agree.	I absolutely agree.	I completely disagree.	I absolutely agree.	I agree	I agree	I agree	I agree	I agree	I completely disagree.	I agree	I absolutely agree.
2025-05-04 23:49:15	Male		Bachelor’s Master’s degree	International Relations 2	Konya	No, I don't use it.
2025-05-04 23:50:10	Woman		Bachelor’s Master’s degree	Preschool teaching	Adana	Yes, I use it.	Yes, I use it.	ChatGPT	No, I don't use it.		No, I don't use it.		2	I use it occasionally.	I rarely use it.	I never use it.	I use it occasionally.	I never use it.	I never use it.	I never use it.	I never use it.	I never use it.	I never use it.	I never use it.		In the last month	1		Education/Learning, Entertainment	I don't feel competent at all.	It's not very important.	I'm undecided.	I'm undecided.	I'm undecided.	I agree	I agree	I agree	I agree	I agree	I disagree.	I agree	I'm undecided.	I agree	I agree	I agree	I agree	I'm undecided.	I agree	I'm undecided.
2025-05-05 00:12:05	Woman		Master’s degree	Radio, Television and Film - Master's Master’s degree	Konya	Yes, I use it.	Yes, I use it.	ChatGPT	No, I don't use it.		No, I don't use it.		3	I use it very often.												Today	1		Education/Learning, Content Creation (text, visual, audio), Business/Professional Purposes	I am competent	Moderately important	I absolutely agree.	I absolutely agree.	I absolutely agree.	I absolutely agree.	I absolutely agree.	I absolutely agree.	I absolutely agree.	I absolutely agree.	I absolutely agree.	I absolutely agree.	I absolutely agree.	I agree	I agree	I agree	I agree	I agree	I agree	I agree
2025-05-05 00:17:21	Woman		Master’s degree	Radio and Television Department Master's Program	Konya	Yes, I use it.	Yes, I use it.	ChatGPT, Bearly Ai	No, I don't use it.		No, I don't use it.		4	I use it frequently.	I never use it.	I never use it.	I rarely use it.	I never use it.	I never use it.	I never use it.	I rarely use it.	I never use it.	I never use it.	I never use it.		In the last week	1		Education/Learning, Content Creation (text, visuals, audio), Business/Professional Purposes, Daily Tasks (calendar, email, suggestions, etc.), Entertainment	I have some competence.	Moderately important	I absolutely agree.	I absolutely agree.	I agree	I absolutely agree.	I absolutely agree.	I'm undecided.	I'm undecided.	I disagree.	I'm undecided.	I'm undecided.	I agree	I absolutely agree.	I absolutely agree.	I absolutely agree.	I absolutely agree.	I'm undecided.	I agree	I absolutely agree.
2025-05-05 00:18:43	Woman		Master’s degree	Radio, Television and Cinema Master's Program	Konya	Yes, I use it.	Yes, I use it.	ChatGPT, DeepSeek, Copilot	No, I don't use it.		Yes, I use it.	Suno	5	I use it very often.	I use it occasionally.	I use it occasionally.	I use it frequently.	I use it frequently.	I use it occasionally.	I use it occasionally.	I use it occasionally.	I use it occasionally.	I use it occasionally.	I use it occasionally.		Today	1		Education / Learning	I have some competence.	Moderately important	I absolutely agree.	I agree	I absolutely agree.	I absolutely agree.	I agree	I absolutely agree.	I agree	I absolutely agree.	I'm undecided.	I absolutely agree.	I absolutely agree.	I agree	I agree	I agree	I agree	I agree	I agree	I agree
2025-05-05 00:19:08	Woman		Bachelor’s Master’s degree	preschool teacher graduate	Adana	Yes, I use it.	Yes, I use it.	ChatGPT	No, I don't use it.		No, I don't use it.		2	I use it occasionally.	I never use it.	I never use it.	I never use it.	I never use it.	I never use it.	I never use it.	I never use it.	I never use it.	I never use it.	I never use it.		A long time ago	1		Education / Learning	I have some competence.	Moderately important	I disagree.	I disagree.	I agree	I agree	I agree	I agree	I agree	I agree	I'm undecided.	I'm undecided.	I disagree.	I agree	I'm undecided.	I agree	I agree	I'm undecided.	I agree	I agree
2025-05-05 01:29:11	Woman		Bachelor’s Master’s degree	Nursing - 1st year	Cankiri	Yes, I use it.	Yes, I use it.	ChatGPT	No, I don't use it.		No, I don't use it.		3	I use it occasionally.	I never use it.	I never use it.	I never use it.	I never use it.	I never use it.	I never use it.	I never use it.	I never use it.	I never use it.	I never use it.		In the last week	1	0 TL	Education/Learning, Content Creation (text, visuals, audio), Entertainment	I have some competence.	Moderately important	I agree	I agree	I agree	I agree	I agree	I agree	I agree	I agree	I'm undecided.	I'm undecided.	I agree	I agree	I agree	I agree	I agree	I agree	I agree	I agree
2025-05-05 08:09:03	Woman		Bachelor’s Master’s degree	Journalism - 4th Year	Ankara	Yes, I use it.	Yes, I use it.	ChatGPT	No, I don't use it.		No, I don't use it.		3	I use it occasionally.	I never use it.	I never use it.	I never use it.	I never use it.	I never use it.	I never use it.	I never use it.	I never use it.	I never use it.	I never use it.	I never use it.	In the last week	1	I haven't paid anything yet.	Content Creation (text, visuals, audio), Entertainment	I have some competence.	It's not very important.	I absolutely agree.	I'm undecided.	I agree	I'm undecided.	I agree	I agree	I disagree.	I disagree.	I agree	I'm undecided.	I agree	I agree	I agree	I completely disagree.	I disagree.	I'm undecided.	I agree	I agree
2025-05-05 10:30:26	Male		Master’s degree	Journalism 1st Year	Konya	No, I don't use it.
2025-05-05 10:31:12	Male		Bachelor’s Master’s degree	Public Relations 4th Year	Konya	No, I don't use it.
2025-05-05 11:22:32	Woman		Master’s degree		Konya	Yes, I use it.	Yes, I use it.	ChatGPT, Gemini	No, I don't use it.		No, I don't use it.		4	I use it frequently.	I use it occasionally.											In the last week	1		Education/Learning, Content Creation (text, visual, audio), Business/Professional Purposes	I have an intermediate level of proficiency.	Important	I agree	I agree	I'm undecided.	I agree	I agree	I agree	I agree	I agree	I agree	I agree	I agree	I agree	I agree	I agree	I agree	I agree	I agree	I agree
2025-05-05 14:33:07	Woman		Master’s degree	Radio TV Cinema Master's Master’s degree	Antalya	Yes, I use it.	Yes, I use it.	ChatGPT, DeepSeek, Copilot	Yes, I use it.	Dal-E	No, I don't use it.		5	I use it occasionally.		I rarely use it.		I rarely use it.								Today	5	500 TL	Education/Learning, Content Creation (text, visuals, audio), Daily Tasks (calendar, email, suggestions, etc.)	I have an intermediate level of proficiency.	Indispensable	I absolutely agree.	I absolutely agree.	I absolutely agree.	I absolutely agree.	I absolutely agree.	I absolutely agree.	I absolutely agree.	I'm undecided.	I'm undecided.	I agree	I absolutely agree.	I absolutely agree.	I absolutely agree.	I'm undecided.	I absolutely agree.	I agree	I absolutely agree.	I'm undecided.
2025-05-05 21:35:36	Woman		Bachelor’s Master’s degree	Sports management graduate	servant	Yes, I use it.	Yes, I use it.	ChatGPT	No, I don't use it.		No, I don't use it.		5	I use it very often.												Today	1		Education/Learning, Content Creation (text, visuals, audio), Daily Tasks (calendar, email, suggestions, etc.), Entertainment	I am competent	Moderately important	I'm undecided.	I'm undecided.	I'm undecided.	I'm undecided.	I'm undecided.	I'm undecided.	I'm undecided.	I'm undecided.	I'm undecided.	I'm undecided.	I agree	I agree	I agree	I agree	I agree	I agree	I agree	I agree
2025-05-05 21:56:12	Woman		Bachelor’s Master’s degree	Social Work - 3rd year	Konya	Yes, I use it.	Yes, I use it.	ChatGPT, Gemini	No, I don't use it.		No, I don't use it.		3	I use it frequently.	I use it very often.	I never use it.	I never use it.	I never use it.	I never use it.	I never use it.	I never use it.	I never use it.	I never use it.	I never use it.	I never use it.	Today	1		Education/Learning, Work/Professional Purposes, Daily Tasks (calendar, email, suggestions, etc.)	I have some competence.	Moderately important	I absolutely agree.	I absolutely agree.	I absolutely agree.	I absolutely agree.	I absolutely agree.	I absolutely agree.	I absolutely agree.	I absolutely agree.	I completely disagree.	I absolutely agree.	I agree	I agree	I'm undecided.	I'm undecided.	I disagree.	I disagree.	I absolutely agree.	I absolutely agree.
2025-05-05 22:09:16	Woman		Bachelor’s Master’s degree	Social Work - 3rd year	Konya	Yes, I use it.	Yes, I use it.	ChatGPT, Gemini	No, I don't use it.		No, I don't use it.		2	I rarely use it.	I rarely use it.											In the last week	1	0 TL	Education/Learning, Content Creation (text, visuals, audio), Entertainment	I have some competence.	It's not very important.	I agree	I'm undecided.	I'm undecided.	I agree	I'm undecided.	I agree	I'm undecided.	I agree	I completely disagree.	I absolutely agree.	I agree	I agree	I agree	I agree	I agree	I disagree.	I agree	I'm undecided.
2025-05-05 22:46:27	Woman		Bachelor’s Master’s degree			Yes, I use it.	Yes, I use it.	ChatGPT	No, I don't use it.		No, I don't use it.		5	I use it very often.												Today	1		Education / Learning	I am competent	Indispensable	I agree	I'm undecided.	I absolutely agree.	I absolutely agree.	I'm undecided.	I'm undecided.	I'm undecided.	I'm undecided.	I'm undecided.	I'm undecided.	I absolutely agree.	I absolutely agree.	I absolutely agree.	I absolutely agree.	I absolutely agree.	I'm undecided.	I agree	I agree
2025-05-05 22:51:52	Woman		Bachelor’s Master’s degree	Art Department - 3rd Year	Konya	Yes, I use it.	Yes, I use it.	ChatGPT	No, I don't use it.		No, I don't use it.		4	I use it very often.	I use it occasionally.											Today	1	0	Education/Learning, Work/Professional Purposes	I have some competence.	Important	I'm undecided.	I'm undecided.	I agree	I agree	I'm undecided.	I agree	I agree	I'm undecided.	I disagree.	I'm undecided.	I agree	I agree	I disagree.	I'm undecided.	I agree	I agree	I agree	I agree
2025-05-05 23:56:00	Male	21	Bachelor’s Master’s degree	4th year Nursing	Konya	Yes, I use it.	Yes, I use it.	ChatGPT	No, I don't use it.		No, I don't use it.		3	I use it occasionally.												In the last month	1	0 TL	Education/Learning, Content Creation (text, visuals, audio)	I have some competence.	It's not very important.	I agree	I agree	I agree	I agree	I agree	I agree	I agree	I'm undecided.	I disagree.	I agree	I'm undecided.	I'm undecided.	I'm undecided.	I agree	I agree	I'm undecided.	I agree	I agree
2025-05-06 00:40:10	Woman	24	Bachelor’s Master’s degree	Radio, TV and cinema	Konya	Yes, I use it.	Yes, I use it.	ChatGPT	Yes, I use it.	Midjourney, Dall-E, Leonardo.ai	No, I don't use it.		3	I use it occasionally.	I never use it.	I never use it.	I never use it.	I never use it.	I never use it.	I rarely use it.	I rarely use it.	I never use it.	I never use it.	I never use it.	I never use it.	In the last week	1	0	Education/Learning, Content Creation (text, visuals, audio), Business/Professional Purposes, Daily Tasks (calendar, email, suggestions, etc.), Entertainment	I have an intermediate level of proficiency.	It's not very important.	I agree	I'm undecided.	I agree	I agree	I agree	I agree	I agree	I agree	I disagree.	I agree	I agree	I agree	I'm undecided.	I'm undecided.	I agree	I agree	I agree	I agree
2025-05-06 07:01:43	Woman	22	Bachelor’s Master’s degree	Third Year Nursing	Ankara	Yes, I use it.	Yes, I use it.	ChatGPT, Gemini	No, I don't use it.		No, I don't use it.		3	I use it very often.	I use it occasionally.	I never use it.	I never use it.	I never use it.	I never use it.	I never use it.	I never use it.	I never use it.	I never use it.	I never use it.	I never use it.	In the last week	1		Education/Learning, Content Creation (text, visuals, audio), Daily Tasks (calendar, email, suggestions, etc.)	I have some competence.	It's not very important.	I agree	I completely disagree.	I'm undecided.	I'm undecided.	I agree	I agree	I'm undecided.	I'm undecided.	I'm undecided.	I absolutely agree.	I'm undecided.	I absolutely agree.	I agree	I agree	I'm undecided.	I'm undecided.	I agree	I'm undecided.
2025-05-06 09:46:45	Woman	25	Bachelor’s Master’s degree	Radio, Television and Cinema - Graduate	Konya	Yes, I use it.	Yes, I use it.	ChatGPT	No, I don't use it.		No, I don't use it.		4	I use it very often.	I never use it.	I never use it.	I never use it.	I never use it.	I never use it.	I never use it.	I never use it.	I never use it.	I never use it.	I never use it.	I never use it.	Today	1		Daily tasks (calendar, email, suggestions, etc.)	I don't feel competent at all.	Important	I agree	I agree	I disagree.	I agree	I agree	I agree	I agree	I'm undecided.	I disagree.	I disagree.	I agree	I agree	I agree	I agree	I agree	I'm undecided.	I agree	I agree
2025-05-06 09:47:20	Woman	33	Bachelor’s Master’s degree	art teacher - graduate	Konya	Yes, I use it.	Yes, I use it.	ChatGPT	Yes, I use it.	Midjourney	No, I don't use it.		3	I use it frequently.	I use it occasionally.	I never use it.	I never use it.	I never use it.	I never use it.	I use it frequently.	I never use it.	I never use it.	I never use it.	I never use it.	I never use it.	In the last week	3		Content Creation (text, visuals, audio), Business/Professional Purposes	I have some competence.	It's not very important.	I agree	I'm undecided.	I disagree.	I agree	I'm undecided.	I'm undecided.	I'm undecided.	I'm undecided.	I'm undecided.	I'm undecided.	I agree	I agree	I agree	I'm undecided.	I'm undecided.	I agree	I agree	I'm undecided.
2025-05-06 09:50:51	Woman	23	Bachelor’s Master’s degree	Third-year Computer Engineering student	Konya	Yes, I use it.	Yes, I use it.	ChatGPT, DeepSeek	Yes, I use it.	I'm doing it via ChatGBT	No, I don't use it.		4	I use it very often.	I never use it.	I use it frequently.	I never use it.	I never use it.	I never use it.	I never use it.	I never use it.	I never use it.	I never use it.	I never use it.	I never use it.	Today	1	20 USD	Education/Learning, Content Creation (text, visuals, audio), Business/Professional Purposes, Daily Tasks (calendar, email, suggestions, etc.), Entertainment, Therapy	I am very competent.	Indispensable	I absolutely agree.	I absolutely agree.	I absolutely agree.	I absolutely agree.	I absolutely agree.	I absolutely agree.	I absolutely agree.	I absolutely agree.	I disagree.	I absolutely agree.	I absolutely agree.	I absolutely agree.	I absolutely agree.	I disagree.	I absolutely agree.	I absolutely agree.	I absolutely agree.	I disagree.
2025-05-06 09:52:34	Woman	21	Bachelor’s Master’s degree	Molecular Biology and Genetics, 2nd year	Konya	Yes, I use it.	Yes, I use it.	ChatGPT, Gemini	No, I don't use it.		No, I don't use it.		5	I use it very often.	I use it occasionally.	I never use it.	I never use it.	I never use it.	I never use it.	I never use it.	I never use it.	I never use it.	I never use it.	I never use it.	I never use it.	Today	1		Education/Learning, Content Creation (text, visual, audio), Business/Professional Purposes	I have an intermediate level of proficiency.	Important	I agree	I disagree.	I agree	I agree	I agree	I agree	I agree	I agree	I disagree.	I agree	I'm undecided.	I agree	I agree	I agree	I agree	I disagree.	I agree	I agree
2025-05-06 09:54:39	Woman	29	Master’s degree	Food Engineering - Graduate	Konya	Yes, I use it.	Yes, I use it.	ChatGPT, Gemini, DeepSeek	Yes, I use it.	Leonardo.ai	No, I don't use it.		3	I use it frequently.	I use it occasionally.	I use it occasionally.										In the last week	1		Education/Learning, Content Creation (text, visuals, audio), Entertainment	I have some competence.	Moderately important	I'm undecided.	I disagree.	I agree	I agree	I agree	I agree	I'm undecided.	I absolutely agree.	I'm undecided.	I agree	I agree	I agree	I agree	I'm undecided.	I'm undecided.	I agree	I agree	I agree
2025-05-06 09:59:04	Male	27	Master’s degree	Public Relations and Advertising - YL	Konya	Yes, I use it.	Yes, I use it.	ChatGPT, Gemini, Perplexity, freepik, piri ai	Yes, I use it.	Dall-E, Leonardo.ai, Sora, freepik	Yes, I use it.	Elevenlabs, Suno	5	I use it very often.	I use it very often.				I use it very often.		I use it occasionally.			I rarely use it.		In the last week	5	20 USD	Education/Learning, Content Creation (text, visuals, audio), Business/Professional Purposes, Daily Tasks (calendar, email, suggestions, etc.)	I have an intermediate level of proficiency.	Important	I agree	I agree	I agree	I absolutely agree.	I'm undecided.	I agree	I agree	I agree	I completely disagree.	I absolutely agree.	I absolutely agree.	I absolutely agree.	I absolutely agree.	I absolutely agree.	I absolutely agree.	I agree	I absolutely agree.	I absolutely agree.
2025-05-06 10:21:10	Woman	25	Bachelor’s Master’s degree	Architecture Graduate	Konya	Yes, I use it.	Yes, I use it.	ChatGPT	Yes, I use it.	Midjourney	No, I don't use it.		5	I use it very often.	I use it frequently.	I rarely use it.	I use it frequently.	I never use it.	I rarely use it.	I use it frequently.	I never use it.	I never use it.	I use it frequently.	I rarely use it.	I never use it.	Today	4	1000	Education/Learning, Content Creation (text, visuals, audio), Business/Professional Purposes, Daily Tasks (calendar, email, suggestions, etc.), Entertainment	I have an intermediate level of proficiency.	Indispensable	I agree	I'm undecided.	I absolutely agree.	I absolutely agree.	I absolutely agree.	I absolutely agree.	I agree	I disagree.	I absolutely agree.	I'm undecided.	I absolutely agree.	I absolutely agree.	I absolutely agree.	I absolutely agree.	I absolutely agree.	I'm undecided.	I absolutely agree.	I disagree.
2025-05-06 10:29:48	Woman	31	Master’s degree	Computer and Instructional Technologies Teaching - Graduate	Konya	Yes, I use it.	Yes, I use it.	ChatGPT, Gemini, Grok, Copilot	Yes, I use it.	Dal-E, Flux	Yes, I use it.	Suno	4	I use it very often.	I use it very often.	I never use it.	I use it frequently.	I use it occasionally.	I never use it.	I rarely use it.	I use it frequently.	I use it frequently.	I never use it.	I use it occasionally.	I never use it.	Today	2		Education/Learning, Content Creation (text, visuals, audio), Business/Professional Purposes, Daily Tasks (calendar, email, suggestions, etc.)	I am competent	Moderately important	I agree	I'm undecided.	I absolutely agree.	I absolutely agree.	I agree	I absolutely agree.	I agree	I absolutely agree.	I completely disagree.	I agree	I absolutely agree.	I absolutely agree.	I absolutely agree.	I absolutely agree.	I absolutely agree.	I'm undecided.	I agree	I absolutely agree.
2025-05-06 11:25:10	Male	25	Bachelor’s Master’s degree	Architecture - Graduate	Konya	Yes, I use it.	Yes, I use it.	ChatGPT, Perplexity, Claude	Yes, I use it.	Midjourney, Dal-E	No, I don't use it.		4	I use it very often.	I rarely use it.	I never use it.	I never use it.	I never use it.	I use it occasionally.	I use it frequently.	I use it frequently.	I never use it.	I never use it.	I never use it.	I never use it.	Today	1		Work/Professional Purposes, Daily Tasks (calendar, email, suggestions, etc.)	I have some competence.	Important	I agree	I agree	I agree	I agree	I'm undecided.	I agree	I absolutely agree.	I disagree.	I'm undecided.	I'm undecided.	I absolutely agree.	I absolutely agree.	I absolutely agree.	I agree	I absolutely agree.	I absolutely agree.	I absolutely agree.	I absolutely agree.
2025-05-06 11:35:06	Woman	25	Bachelor’s Master’s degree	Primary school mathematics teacher training - 3rd year	Konya	Yes, I use it.	Yes, I use it.	ChatGPT, Gemini, DeepSeek	Yes, I use it.	Midjourney, Dall-E, Leonardo.ai	Yes, I use it.	Suno	4	I use it frequently.	I use it occasionally.	I use it occasionally.	I never use it.	I rarely use it.	I never use it.	I use it occasionally.	I use it occasionally.	I never use it.	I never use it.	I rarely use it.	I never use it.	In the last week	1		Education/Learning, Content Creation (text, visuals, audio), Daily Tasks (calendar, email, suggestions, etc.), Entertainment	I have an intermediate level of proficiency.	Moderately important	I absolutely agree.	I'm undecided.	I'm undecided.	I agree	I'm undecided.	I agree	I agree	I disagree.	I'm undecided.	I agree	I absolutely agree.	I absolutely agree.	I agree	I agree	I absolutely agree.	I agree	I agree	I agree
2025-05-06 11:37:30	Male	24	Bachelor’s Master’s degree	Computer Engineering - 3rd Year	Konya	Yes, I use it.	Yes, I use it.	ChatGPT, Claud.ai	Yes, I use it.	Midjourney	No, I don't use it.		5	I use it very often.	I use it occasionally.	I rarely use it.	I never use it.	I never use it.	I never use it.	I use it occasionally.	I never use it.	I never use it.	I never use it.	I never use it.	I never use it.	In the last week	2	20 USD	Education/Learning, Content Creation (text, visual, audio), Business/Professional Purposes, Entertainment	I have an intermediate level of proficiency.	Moderately important	I absolutely agree.	I agree	I agree	I agree	I'm undecided.	I agree	I agree	I disagree.	I disagree.	I'm undecided.	I agree	I absolutely agree.	I agree	I'm undecided.	I absolutely agree.	I'm undecided.	I'm undecided.	I agree
2025-05-06 12:07:13	Woman	24	Bachelor’s Master’s degree	Philosophy PR. - 4th Year	Konya	Yes, I use it.	Yes, I use it.	ChatGPT	No, I don't use it.		No, I don't use it.		1	I use it occasionally.	I never use it.	I never use it.	I never use it.	I never use it.	I never use it.	I never use it.	I never use it.	I never use it.	I never use it.	I never use it.	I never use it.	Today	1		Education / Learning	I don't feel competent at all.	It doesn't matter at all.	I absolutely agree.	I agree	I'm undecided.	I'm undecided.	I agree	I completely disagree.	I'm undecided.	I absolutely agree.	I completely disagree.	I absolutely agree.	I disagree.	I'm undecided.	I completely disagree.	I completely disagree.	I disagree.	I completely disagree.	I completely disagree.	I completely disagree.
2025-05-06 16:52:10	Male	28	Doctoral degree	PhD Student in the History of Islamic Science	Konya	Yes, I use it.	Yes, I use it.	ChatGPT	Yes, I use it.	Midjourney, Dal-E	Yes, I use it.	Elevenlabs, Suno	4	I use it frequently.	I rarely use it.	I rarely use it.	I rarely use it.	I rarely use it.	I rarely use it.	I use it frequently.	I use it frequently.	I rarely use it.	I never use it.	I never use it.	I never use it.	Today	1	200	Education/Learning, Work/Professional Purposes, Daily Tasks (calendar, email, suggestions, etc.)	I am competent	Important	I agree	I agree	I agree	I'm undecided.	I agree	I agree	I agree	I agree	I disagree.	I'm undecided.	I agree	I agree	I agree	I agree	I absolutely agree.	I absolutely agree.	I absolutely agree.	I absolutely agree.
2025-05-06 21:36:06	Male	25	Bachelor’s Master’s degree	Business	Konya	Yes, I use it.	Yes, I use it.	ChatGPT, Gamma	Yes, I use it.	Midjourney, Leonardo.ai, Sora	No, I don't use it.		5	I use it very often.	I rarely use it.	I never use it.	I never use it.	I rarely use it.	I never use it.	I use it occasionally.	I never use it.	I never use it.	I never use it.	I use it occasionally.	I never use it.	Today	1	0	Education/Learning, Content Creation (text, visuals, audio), Business/Professional Purposes, Daily Tasks (calendar, email, suggestions, etc.), Entertainment	I have an intermediate level of proficiency.	Important	I agree	I agree	I'm undecided.	I absolutely agree.	I absolutely agree.	I agree	I agree	I absolutely agree.	I'm undecided.	I agree	I absolutely agree.	I agree	I agree	I absolutely agree.	I absolutely agree.	I'm undecided.	I absolutely agree.	I absolutely agree.
2025-05-06 23:06:47	Woman	21	Bachelor’s Master’s degree	Art History, 2nd Year	Konya	Yes, I use it.	Yes, I use it.	ChatGPT	No, I don't use it.		No, I don't use it.		5	I use it very often.	I use it occasionally.	I never use it.	I never use it.	I never use it.	I never use it.	I never use it.	I never use it.	I never use it.	I never use it.	I never use it.	I never use it.	Today	3	500 TL	Education/Learning, Content Creation (text, visuals, audio), Business/Professional Purposes, Daily Tasks (calendar, email, suggestions, etc.), Entertainment	I am competent	Indispensable	I absolutely agree.	I agree	I absolutely agree.	I absolutely agree.	I absolutely agree.	I absolutely agree.	I agree	I absolutely agree.	I completely disagree.	I absolutely agree.	I absolutely agree.	I absolutely agree.	I absolutely agree.	I'm undecided.	I absolutely agree.	I absolutely agree.	I absolutely agree.	I agree
2025-05-06 23:22:21	Woman	21	Bachelor’s Master’s degree	physiotherapy 1	Konya	Yes, I use it.	Yes, I use it.	ChatGPT, Gemini	No, I don't use it.		No, I don't use it.		3	I use it frequently.	I use it occasionally.	I never use it.	I never use it.	I never use it.	I never use it.	I never use it.	I never use it.	I never use it.	I never use it.	I never use it.	I never use it.	In the last week	1	0	Content Creation (text, visuals, audio), Daily Tasks (calendar, email, recommendations, etc.)	I have some competence.	It's not very important.	I'm undecided.	I'm undecided.	I agree	I agree	I absolutely agree.	I absolutely agree.	I agree	I agree	I agree	I'm undecided.	I agree	I agree	I agree	I agree	I agree	I agree	I agree	I agree
2025-05-06 23:49:27	Woman	23	Bachelor’s Master’s degree	Literature	Pain	Yes, I use it.	Yes, I use it.	ChatGPT, Gemini, Grok	No, I don't use it.		No, I don't use it.		2	I use it frequently.	I never use it.	I never use it.	I use it frequently.	I never use it.	I never use it.	I never use it.	I never use it.	I never use it.	I never use it.	I never use it.	I never use it.	In the last week	1		Education/Learning, Entertainment	I don't feel competent at all.	Moderately important	I agree	I agree	I agree	I agree	I agree	I agree	I agree	I agree	I agree	I agree	I agree	I agree	I agree	I agree	I agree	I agree	I agree	I agree
2025-05-06 23:50:48	Woman	23	Bachelor’s Master’s degree	Molecular Biology and Genetics, 3rd Year	Konya	Yes, I use it.	Yes, I use it.	ChatGPT, Gemini, DeepSeek	No, I don't use it.		No, I don't use it.		5	I use it very often.	I use it frequently.	I use it frequently.	I never use it.	I never use it.	I never use it.	I never use it.	I never use it.	I never use it.	I never use it.	I never use it.	I never use it.	Today	1		Education/Learning, Work/Professional Purposes	I have an intermediate level of proficiency.	Important	I agree	I agree	I agree	I absolutely agree.	I absolutely agree.	I absolutely agree.	I agree	I'm undecided.	I'm undecided.	I'm undecided.	I absolutely agree.	I absolutely agree.	I absolutely agree.	I agree	I absolutely agree.	I absolutely agree.	I absolutely agree.	I absolutely agree.
2025-05-06 23:56:08	Woman	20	Bachelor’s Master’s degree	Sociology 1st year	Konya	Yes, I use it.	Yes, I use it.	ChatGPT	No, I don't use it.		No, I don't use it.		4	I use it very often.	I never use it.	I never use it.	I never use it.	I never use it.	I never use it.	I never use it.	I never use it.	I never use it.	I never use it.	I never use it.	I never use it.	Today	1		Education / Learning	I have some competence.	Moderately important	I agree	I'm undecided.	I agree	I absolutely agree.	I agree	I absolutely agree.	I absolutely agree.	I absolutely agree.	I absolutely agree.	I absolutely agree.	I absolutely agree.	I absolutely agree.	I absolutely agree.	I'm undecided.	I completely disagree.	I'm undecided.	I absolutely agree.	I absolutely agree.
2025-05-07 00:16:21	Woman	22	Bachelor’s Master’s degree	Child Development - 3rd year	Konya	Yes, I use it.	Yes, I use it.	ChatGPT	No, I don't use it.		No, I don't use it.		4	I use it frequently.	I never use it.	I never use it.	I never use it.	I never use it.	I never use it.	I never use it.	I never use it.	I never use it.	I never use it.	I never use it.	I never use it.	Today	1		Education/Learning, Content Creation (text, visuals, audio), Business/Professional Purposes, Daily Tasks (calendar, email, suggestions, etc.), Entertainment	I am competent	Moderately important	I absolutely agree.	I'm undecided.	I agree	I absolutely agree.	I absolutely agree.	I absolutely agree.	I agree	I'm undecided.	I completely disagree.	I absolutely agree.	I agree	I absolutely agree.	I absolutely agree.	I absolutely agree.	I absolutely agree.	I'm undecided.	I agree	I agree
2025-05-07 08:18:40	Woman	21	Bachelor’s Master’s degree	Jewelry making and design, 1st year.	Konya	Yes, I use it.	Yes, I use it.	ChatGPT	Yes, I use it.	Flux	Yes, I use it.	Elevenlabs	4	I use it frequently.	I never use it.	I rarely use it.	I rarely use it.	I never use it.	I use it occasionally.	I never use it.	I never use it.	I use it occasionally.	I never use it.	I never use it.	I rarely use it.	In the last week	1		Education/Learning, Content Creation (text, visual, audio), Business/Professional Purposes	I have some competence.	Moderately important	I completely disagree.	I agree	I agree	I agree	I absolutely agree.	I absolutely agree.	I absolutely agree.	I absolutely agree.	I agree	I disagree.	I agree	I agree	I agree	I agree	I agree	I agree	I agree	I agree
2025-05-07 08:45:30	Woman	25	Bachelor’s Master’s degree	Philosophy 4th Grade	Konya	Yes, I use it.	Yes, I use it.	ChatGPT, Gemini	No, I don't use it.		No, I don't use it.		4	I use it very often.	I rarely use it.	I never use it.	I never use it.	I never use it.	I never use it.	I never use it.	I never use it.	I never use it.	I never use it.	I never use it.	I never use it.	Today	1		Education/Learning, Content Creation (text, visuals, audio), Business/Professional Purposes, Daily Tasks (calendar, email, suggestions, etc.), Entertainment	I have an intermediate level of proficiency.	Moderately important	I absolutely agree.	I agree	I absolutely agree.	I agree	I agree	I agree	I agree	I agree	I agree	I agree	I absolutely agree.	I absolutely agree.	I absolutely agree.	I absolutely agree.	I absolutely agree.	I absolutely agree.	I absolutely agree.	I absolutely agree.
2025-05-07 10:46:56	Woman	24	Bachelor’s Master’s degree	Finance and Banking 4th year graduate	Konya	No, I don't use it.
2025-05-07 11:28:22	Woman	26	Bachelor’s Master’s degree	Graphic Design Graduate	Izmir	Yes, I use it.	Yes, I use it.	ChatGPT, Gemini, DeepSeek	Yes, I use it.	Midjourney, Dall-E, Kling	Yes, I use it.	Elevenlabs	4	I use it very often.	I use it very often.	I use it very often.	I rarely use it.	I use it occasionally.	I rarely use it.	I use it very often.	I use it very often.		I use it occasionally.	I use it frequently.	I never use it.	Today	4	50 USD	Content Creation (text, visuals, audio), Business/Professional Purposes	I have an intermediate level of proficiency.	It's not very important.	I absolutely agree.	I agree	I agree	I agree	I agree	I agree	I agree	I agree	I completely disagree.	I absolutely agree.	I'm undecided.	I agree	I disagree.	I completely disagree.	I disagree.	I completely disagree.	I completely disagree.	I completely disagree.
2025-05-07 16:03:27	Woman	23	Master’s degree	Sociology Master's Program - 1st Year	Isparta	Yes, I use it.	Yes, I use it.	ChatGPT	No, I don't use it.		No, I don't use it.		5	I use it very often.	I never use it.		I never use it.	I never use it.	I never use it.	I never use it.	I never use it.	I never use it.	I never use it.	I never use it.	I never use it.	Today	1	0 TL	Education/Learning, Content Creation (text, visuals, audio), Business/Professional Purposes, Daily Tasks (calendar, email, suggestions, etc.), Entertainment	I am competent	Indispensable	I disagree.	I absolutely agree.	I absolutely agree.	I absolutely agree.	I absolutely agree.	I absolutely agree.	I absolutely agree.	I absolutely agree.	I'm undecided.	I'm undecided.	I absolutely agree.	I absolutely agree.	I absolutely agree.	I absolutely agree.	I absolutely agree.	I absolutely agree.	I absolutely agree.	I absolutely agree.
2025-05-07 21:55:22	Woman	23	Bachelor’s Master’s degree	Finance department, 4th year	Isparta	Yes, I use it.	Yes, I use it.	ChatGPT	No, I don't use it.		No, I don't use it.		2	I use it occasionally.	I never use it.	I never use it.	I never use it.	I never use it.	I never use it.	I never use it.	I never use it.	I never use it.	I never use it.	I never use it.	I never use it.	Today	1	500	Education / Learning	I have some competence.	It's not very important.	I agree	I agree	I'm undecided.	I agree	I agree	I agree	I agree	I agree	I disagree.	I agree	I agree	I agree	I agree	I agree	I agree	I agree	I agree	I agree
2025-05-07 23:44:13	Woman	22	Bachelor’s Master’s degree	Radio, Television and Cinema - Grade 4	Ankara	Yes, I use it.	Yes, I use it.	ChatGPT	Yes, I use it.	Runway ML	Yes, I use it.	Suno	3	I use it frequently.	I rarely use it.	I rarely use it.	I never use it.	I never use it.	I never use it.	I rarely use it.	I use it occasionally.	I never use it.	I use it occasionally.	I rarely use it.	I use it frequently.	In the last week	1	0 TL	Education/Learning, Content Creation (text, visual, audio), Business/Professional Purposes, Entertainment	I have an intermediate level of proficiency.	Moderately important	I agree	I'm undecided.	I agree	I agree	I'm undecided.	I agree	I agree	I'm undecided.	I'm undecided.	I agree	I agree	I agree	I agree	I'm undecided.	I agree	I'm undecided.	I agree	I'm undecided.
2025-05-08 13:46:49	Woman	33	Master’s degree	Physics Teaching - Graduate	Konya	Yes, I use it.	Yes, I use it.	ChatGPT, Gemini, Copilot	No, I don't use it.		No, I don't use it.		5	I use it very often.	I use it very often.			I use it very often.								Today	1		Education/Learning, Content Creation (text, visuals, audio), Business/Professional Purposes, Daily Tasks (calendar, email, suggestions, etc.), Entertainment	I have an intermediate level of proficiency.	Indispensable	I agree	I agree	I agree	I absolutely agree.	I agree	I agree	I agree	I agree	I completely disagree.	I agree	I absolutely agree.	I absolutely agree.	I absolutely agree.	I agree	I absolutely agree.	I agree	I absolutely agree.	I'm undecided.
2025-05-08 16:48:24	Male	23	Bachelor’s Master’s degree	Radio, Cinema and Television 4th year	Konya	Yes, I use it.	Yes, I use it.	ChatGPT, Gemini, Grok	No, I don't use it.		No, I don't use it.		5	I use it very often.	I use it occasionally.	I never use it.	I use it very often.	I never use it.	I never use it.	I never use it.	I never use it.	I never use it.	I never use it.	I never use it.	I never use it.	Today	3	600	Education/Learning, Work/Professional Purposes	I am very competent.	Indispensable	I absolutely agree.	I agree	I absolutely agree.	I agree	I'm undecided.	I'm undecided.	I absolutely agree.	I absolutely agree.	I absolutely agree.	I absolutely agree.	I absolutely agree.	I absolutely agree.	I absolutely agree.	I absolutely agree.	I absolutely agree.	I completely disagree.	I absolutely agree.	I'm undecided.
2025-05-08 16:50:27	Male	23	Bachelor’s Master’s degree	Radio, Television and Cinema Department - 4th Year	Istanbul	Yes, I use it.	Yes, I use it.	ChatGPT	Yes, I use it.	Runway ML	Yes, I use it.	Elevenlabs	5	I use it very often.	I never use it.	I rarely use it.	I rarely use it.	I rarely use it.	I rarely use it.	I rarely use it.	I rarely use it.	I rarely use it.	I use it very often.	I use it very often.	I use it very often.	Today	1	0	Content Creation (text, visuals, audio)	I am very competent.	Indispensable	I absolutely agree.	I absolutely agree.	I absolutely agree.	I absolutely agree.	I absolutely agree.	I absolutely agree.	I absolutely agree.	I absolutely agree.	I disagree.	I absolutely agree.	I absolutely agree.	I absolutely agree.	I absolutely agree.	I absolutely agree.	I absolutely agree.	I absolutely agree.	I absolutely agree.	I absolutely agree.
2025-05-08 17:28:02	Woman	22	Bachelor’s Master’s degree	Radio, Television and Cinema - 4th Year	Konya	Yes, I use it.	Yes, I use it.	ChatGPT, Gemini	No, I don't use it.		Yes, I use it.	Suno	3	I use it frequently.	I use it frequently.	I never use it.	I never use it.	I never use it.	I never use it.	I never use it.	I never use it.	I never use it.	I never use it.	I never use it.	I never use it.	In the last week	1	100	Education/Learning, Content Creation (text, visuals, audio)	I have an intermediate level of proficiency.	Moderately important	I'm undecided.	I disagree.	I'm undecided.	I agree	I agree	I agree	I agree	I disagree.	I disagree.	I absolutely agree.	I absolutely agree.	I agree	I'm undecided.	I'm undecided.	I absolutely agree.	I agree	I agree	I'm undecided.
2025-05-08 17:34:14	Male	21	Bachelor’s Master’s degree	Radio, Television and Cinema, 4th year	Konya	Yes, I use it.	Yes, I use it.	ChatGPT	Yes, I use it.	Sora,	Yes, I use it.	Elevenlabs	4	I use it very often.	I rarely use it.	I rarely use it.	I use it very often.	I never use it.	I never use it.	I never use it.	I never use it.	I use it occasionally.	I never use it.	I use it occasionally.	I never use it.	In the last week	1	0 TL	Education/Learning, Content Creation (text, visuals, audio), Daily Tasks (calendar, email, suggestions, etc.)	I am competent	Important	I agree	I disagree.	I agree	I agree	I agree	I'm undecided.	I'm undecided.	I disagree.	I agree	I disagree.	I agree	I agree	I agree	I agree	I agree	I agree	I agree	I agree
2025-05-08 17:35:20	Male	23	Bachelor’s Master’s degree	Radio, Television, and Cinema - 4th Grade	Konya	Yes, I use it.	Yes, I use it.	ChatGPT, Copilot	No, I don't use it.		Yes, I use it.	Suno	3	I use it frequently.	I never use it.	I rarely use it.	I rarely use it.	I use it occasionally.	I never use it.	I never use it.	I never use it.	I never use it.	I never use it.	I never use it.	I never use it.	In the last week	2	650 TL	Education/Learning, Content Creation (text, visuals, audio), Business/Professional Purposes, Daily Tasks (calendar, email, suggestions, etc.), Entertainment	I have an intermediate level of proficiency.	Moderately important	I agree	I completely disagree.	I'm undecided.	I absolutely agree.	I agree	I agree	I disagree.	I completely disagree.	I agree	I absolutely agree.	I agree	I absolutely agree.	I absolutely agree.	I absolutely agree.	I absolutely agree.	I'm undecided.	I agree	I'm undecided.
2025-05-08 21:58:08	Woman	23	Bachelor’s Master’s degree	Radio, Television and Cinema, 4th grade	Ankara	Yes, I use it.	Yes, I use it.	ChatGPT, Gemini	No, I don't use it.		No, I don't use it.		4	I use it very often.	I use it frequently.											In the last week	1		Daily Tasks (calendar, email, recommendations, etc.), Entertainment	I am competent	Important	I agree	I agree	I agree	I'm undecided.	I agree	I'm undecided.	I agree	I'm undecided.	I agree	I'm undecided.	I agree	I agree	I agree	I agree	I agree	I'm undecided.	I agree	I'm undecided.
2025-05-09 03:13:13	Male	22	Bachelor’s Master’s degree	Radio, Television and Cinema - 4th Grade	Konya	Yes, I use it.	Yes, I use it.	ChatGPT, Gemini, DeepSeek, Copilot	No, I don't use it.		No, I don't use it.		3	I use it frequently.	I rarely use it.	I rarely use it.	I rarely use it.	I rarely use it.	I never use it.	I never use it.	I never use it.	I never use it.	I never use it.	I rarely use it.	I never use it.	In the last week	1		Education/Learning, Content Creation (text, visuals, audio), Entertainment	I am very competent.	Important	I agree	I'm undecided.	I absolutely agree.	I absolutely agree.	I agree	I agree	I agree	I agree	I completely disagree.	I absolutely agree.	I absolutely agree.	I absolutely agree.	I agree	I absolutely agree.	I absolutely agree.	I disagree.	I'm undecided.	I'm undecided.
2025-05-09 12:25:41	Male	33	Master’s degree	Astronomy	Konya	Yes, I use it.	Yes, I use it.	ChatGPT, Gemini, DeepSeek	No, I don't use it.		No, I don't use it.		4	I rarely use it.	I use it very often.											Today	4	350 TL	Education/Learning, Work/Professional Purposes, Data Analysis	I have an intermediate level of proficiency.	Important	I agree	I agree	I absolutely agree.	I absolutely agree.	I absolutely agree.	I agree	I absolutely agree.	I absolutely agree.	I completely disagree.	I absolutely agree.	I absolutely agree.	I absolutely agree.	I absolutely agree.	I absolutely agree.	I absolutely agree.	I absolutely agree.	I absolutely agree.	I absolutely agree.
2025-05-09 22:37:02	Woman	26	Bachelor’s Master’s degree	Public Relations and Promotion - Graduate	Konya	Yes, I use it.	Yes, I use it.	ChatGPT	No, I don't use it.		No, I don't use it.		3	I use it very often.	I never use it.	I never use it.	I never use it.	I never use it.	I never use it.	I never use it.	I never use it.	I never use it.	I never use it.	I never use it.	I never use it.	Today	1	0	Work/Professional Purposes, Daily Tasks (calendar, email, suggestions, etc.)	I have some competence.	Moderately important	I agree	I'm undecided.	I agree	I'm undecided.	I'm undecided.	I agree	I'm undecided.	I absolutely agree.	I completely disagree.	I completely disagree.	I agree	I agree	I'm undecided.	I agree	I'm undecided.	I agree	I agree	I disagree.
2025-05-10 10:41:02	Woman	23	Bachelor’s Master’s degree	Graphics - 4th Grade	Konya	Yes, I use it.	Yes, I use it.	ChatGPT, Grok, Copilot	Yes, I use it.	Ideogram	Yes, I use it.	Elevenlabs	4	I use it frequently.	I never use it.	I never use it.	I use it occasionally.	I use it very often.	I never use it.	I never use it.	I never use it.	I never use it.	I never use it.	I never use it.	I never use it.	In the last week	1		Education/Learning, Content Creation (text, visual, audio), Business/Professional Purposes	I have an intermediate level of proficiency.	Important	I'm undecided.	I disagree.	I'm undecided.	I agree	I'm undecided.	I'm undecided.	I'm undecided.	I agree	I disagree.	I absolutely agree.	I absolutely agree.	I agree	I disagree.	I agree	I absolutely agree.	I'm undecided.	I agree	I'm undecided.
2025-05-10 11:46:54	Male	21	Bachelor’s Master’s degree	Foreign Trade - 1st Class	Konya	Yes, I use it.	Yes, I use it.	ChatGPT	Yes, I use it.	Sora	No, I don't use it.		2	I use it frequently.	I never use it.	I rarely use it.	I use it occasionally.	I never use it.	I never use it.	I never use it.	I never use it.	I never use it.	I never use it.	I never use it.	I never use it.	Today	1	0	Daily tasks (calendar, email, suggestions, etc.)	I have some competence.	Important	I agree	I agree	I agree	I absolutely agree.	I absolutely agree.	I absolutely agree.	I absolutely agree.	I agree	I agree	I agree	I'm undecided.	I agree	I agree	I agree	I agree	I agree	I'm undecided.	I agree
2025-05-10 13:30:26	Woman	19	Bachelor’s Master’s degree			Yes, I use it.	No, I don't use it.		Yes, I use it.	Leonardo.ai	Yes, I use it.	Elevenlabs	2	I use it occasionally.												In the last month	3		Education / Learning	I have some competence.	It's not very important.	I completely disagree.	I disagree.	I disagree.	I completely disagree.	I completely disagree.	I disagree.	I completely disagree.	I completely disagree.	I disagree.	I completely disagree.	I disagree.	I completely disagree.	I disagree.	I completely disagree.	I completely disagree.	I completely disagree.	I disagree.	I completely disagree.
2025-05-10 15:28:58	Male	21	Bachelor’s Master’s degree	Electrical and Electronics Engineering - 2nd year	Konya	Yes, I use it.	Yes, I use it.	ChatGPT, Gemini, DeepSeek, Grok, Perplexity, Copilot	Yes, I use it.	Midjourney, Dall-E, Flux, Sora	Yes, I use it.	Elevenlabs	5	I use it very often.	I use it very often.	I use it very often.	I use it very often.		I use it very often.	I use it very often.	I use it very often.	I use it occasionally.				Today	5	1500 TL	Education/Learning, Content Creation (text, visuals, audio), Business/Professional Purposes, Daily Tasks (calendar, email, suggestions, etc.)	I have an intermediate level of proficiency.	Indispensable	I absolutely agree.	I agree	I agree	I agree	I agree	I agree	I agree	I disagree.	I disagree.	I'm undecided.	I absolutely agree.	I absolutely agree.	I absolutely agree.	I absolutely agree.	I absolutely agree.	I absolutely agree.	I agree	I agree
2025-05-10 15:30:07	Male	28	Bachelor’s Master’s degree	Faculty of Theology, 1st Year	Konya	Yes, I use it.	Yes, I use it.	ChatGPT	No, I don't use it.		No, I don't use it.		3	I use it occasionally.	I never use it.	I never use it.	I never use it.	I never use it.	I never use it.	I never use it.	I never use it.	I never use it.	I never use it.	I never use it.	I never use it.	In the last week	1		Content Creation (text, visuals, audio)	I have an intermediate level of proficiency.	It's not very important.	I agree	I agree	I agree	I agree	I agree	I agree	I agree	I agree	I agree	I agree	I agree	I agree	I agree	I agree	I agree	I agree	I agree	I agree
2025-05-10 15:34:09	Male	30	Bachelor’s Master’s degree	Insurance 4th year	Konya	No, I don't use it.
2025-05-10 19:39:09	Male	25	Bachelor’s Master’s degree	Public Relations and Advertising	Konya	Yes, I use it.	Yes, I use it.	ChatGPT, Gemini	Yes, I use it.	Midjourney, Dall-E, Leonardo.ai	Yes, I use it.	Suno	2	I use it frequently.	I rarely use it.	I never use it.	I never use it.	I never use it.	I never use it.	I use it occasionally.	I rarely use it.	I never use it.	I never use it.	I rarely use it.	I never use it.	In the last week	1	0 TL	Content Creation (text, visuals, audio), Entertainment	I have an intermediate level of proficiency.	It's not very important.	I absolutely agree.	I disagree.	I agree	I agree	I agree	I agree	I agree	I agree	I agree	I agree	I agree	I'm undecided.	I'm undecided.	I'm undecided.	I'm undecided.	I'm undecided.	I agree	I disagree.
2025-05-10 21:28:56	Woman	23	Bachelor’s Master’s degree	Psychology 2nd Year	Konya	Yes, I use it.	Yes, I use it.	ChatGPT	No, I don't use it.		No, I don't use it.		5	I use it very often.	I rarely use it.	I never use it.	I never use it.	I never use it.	I never use it.	I never use it.	I never use it.	I never use it.	I never use it.	I never use it.	I never use it.	Today	1		Education / Learning	I am competent	Indispensable	I'm undecided.	I disagree.	I absolutely agree.	I absolutely agree.	I absolutely agree.	I absolutely agree.	I'm undecided.	I absolutely agree.	I absolutely agree.	I absolutely agree.	I absolutely agree.	I absolutely agree.	I absolutely agree.	I absolutely agree.	I completely disagree.	I disagree.	I absolutely agree.	I completely disagree.
2025-05-11 00:25:06	Woman	29	Master’s degree	Radio, Television and Cinema	Konya	Yes, I use it.	Yes, I use it.	ChatGPT, DeepSeek	Yes, I use it.	Dall-E, Leonardo.ai, Sora	Yes, I use it.	Elevenlabs, Suno	4	I use it frequently.	I use it occasionally.	I use it frequently.	I never use it.	I use it frequently.	I use it frequently.	I use it frequently.	I use it frequently.	I use it occasionally.	I use it occasionally.	I rarely use it.	I rarely use it.	Today	3	0	Education/Learning, Content Creation (text, visuals, audio)	I have an intermediate level of proficiency.	Important	I agree	I agree	I agree	I agree	I'm undecided.	I agree	I agree	I'm undecided.	I disagree.	I disagree.	I agree	I agree	I'm undecided.	I'm undecided.	I agree	I'm undecided.	I agree	I agree
2025-05-11 11:23:28	Male	21	Bachelor’s Master’s degree	International Relations 2	Konya	Yes, I use it.	Yes, I use it.	ChatGPT	No, I don't use it.		No, I don't use it.		5	I use it very often.												In the last week	5	650 TL/month	Education/Learning, Content Creation (text, visuals, audio), Business/Professional Purposes, Daily Tasks (calendar, email, suggestions, etc.)	I am competent	Important	I agree	I'm undecided.	I absolutely agree.	I absolutely agree.	I agree	I agree	I agree	I absolutely agree.	I'm undecided.	I'm undecided.	I agree	I agree	I agree	I agree	I agree	I'm undecided.	I agree	I agree
2025-05-11 13:35:05	Woman	20	Bachelor’s Master’s degree	International Relations - 2nd Year	Konya	Yes, I use it.	Yes, I use it.	ChatGPT, Grok	No, I don't use it.		No, I don't use it.		4	I use it frequently.	I never use it.	I use it occasionally.	I use it occasionally.	I never use it.	I never use it.	I never use it.	I never use it.	I never use it.	I never use it.	I never use it.	I never use it.	In the last week	1		Education/Learning, Daily Tasks (calendar, email, suggestions, etc.)	I have some competence.	Moderately important	I agree	I'm undecided.	I agree	I'm undecided.	I disagree.	I agree	I'm undecided.	I'm undecided.	I disagree.	I disagree.	I agree	I agree	I agree	I'm undecided.	I'm undecided.	I'm undecided.	I agree	I agree
2025-05-11 15:53:54	Woman	31	Doctoral degree	Graphic design thesis period	Balıkesir	Yes, I use it.	Yes, I use it.	ChatGPT	Yes, I use it.	Midjourney, Dall-E, Sora, Imagen	No, I don't use it.		3	I use it frequently.	I rarely use it.	I rarely use it.	I never use it.	I never use it.	I never use it.	I rarely use it.	I use it frequently.	I never use it.	I never use it.	I use it frequently.	I never use it.	In the last week	2	30 USD	Education/Learning, Content Creation (text, visual, audio), Business/Professional Purposes	I have an intermediate level of proficiency.	Important	I'm undecided.	I'm undecided.	I agree	I agree	I agree	I agree	I agree	I agree	I completely disagree.	I absolutely agree.	I agree	I agree	I agree	I agree	I absolutely agree.	I absolutely agree.	I agree	I'm undecided.
2025-05-11 16:34:16	Woman	25	Master’s degree	Social Studies Teacher Training	Malatya	Yes, I use it.	Yes, I use it.	ChatGPT	Yes, I use it.	Dall-E, Leonardo.ai	Yes, I use it.	Suno	5	I use it very often.	I use it occasionally.	I use it occasionally.	I never use it.	I never use it.	I never use it.	I never use it.	I use it very often.	I never use it.	I never use it.	I never use it.	I never use it.	Today	1	0	Education/Learning, Content Creation (text, visuals, audio), Business/Professional Purposes, Daily Tasks (calendar, email, suggestions, etc.), Entertainment	I am very competent.	Moderately important	I absolutely agree.	I absolutely agree.	I absolutely agree.	I absolutely agree.	I absolutely agree.	I absolutely agree.	I absolutely agree.	I absolutely agree.	I absolutely agree.	I absolutely agree.	I absolutely agree.	I absolutely agree.	I completely disagree.	I absolutely agree.	I absolutely agree.	I'm undecided.	I absolutely agree.	I absolutely agree.
2025-05-11 17:41:55	Male	28	Master’s degree		Konya	Yes, I use it.	Yes, I use it.	ChatGPT	No, I don't use it.		No, I don't use it.		3	I use it very often.	I never use it.	I never use it.	I use it occasionally.	I never use it.	I never use it.	I never use it.	I never use it.	I never use it.		I never use it.	I never use it.	Today	3	10 dollars	Education/Learning, Content Creation (text, visuals, audio), Business/Professional Purposes, Daily Tasks (calendar, email, suggestions, etc.), Entertainment	I have an intermediate level of proficiency.	Important	I agree	I agree	I agree	I agree	I agree	I agree	I agree	I agree	I agree	I agree	I agree	I agree	I agree	I agree	I agree	I agree	I agree	I agree
2025-05-11 17:59:46	Woman	51	Bachelor’s Master’s degree	Embroidery teacher	Konya	Yes, I use it.	Yes, I use it.	ChatGPT, Gemini	No, I don't use it.		No, I don't use it.		4	I use it frequently.	I use it frequently.	I never use it.	I never use it.	I never use it.	I never use it.	I never use it.	I never use it.	I never use it.	I never use it.	I never use it.	I never use it.	Today	1	000	Education/Learning, Content Creation (text, visuals, audio), Business/Professional Purposes, Daily Tasks (calendar, email, suggestions, etc.)	I have an intermediate level of proficiency.	Important	I agree	I agree	I agree	I agree	I agree	I agree	I agree	I agree	I agree	I agree	I agree	I absolutely agree.	I absolutely agree.	I absolutely agree.	I absolutely agree.	I absolutely agree.	I absolutely agree.	I absolutely agree.
2025-05-11 19:34:31	Male	32	Doctoral degree	PhD in Philosophy and Religious Studies	Nevsehir	Yes, I use it.	Yes, I use it.	ChatGPT, Gemini	Yes, I use it.	Midjourney, Dall-E, Sora, Kling	Yes, I use it.	Elevenlabs, Suno	4	I use it frequently.	I use it frequently.	I rarely use it.			I use it occasionally.	I use it occasionally.	I use it occasionally.					In the last week	4	20 USD	Education/Learning, Work/Professional Purposes, Daily Tasks (calendar, email, suggestions, etc.), Entertainment	I have an intermediate level of proficiency.	It's not very important.	I absolutely agree.	I absolutely agree.	I agree	I agree	I agree	I agree	I agree	I absolutely agree.	I completely disagree.	I agree	I agree	I'm undecided.	I'm undecided.	I agree	I agree	I'm undecided.	I agree	I agree
2025-05-11 19:41:49	Male	38	Doctoral degree	Doctoral degree	Konya	Yes, I use it.	Yes, I use it.	ChatGPT, DeepSeek, Copilot	No, I don't use it.		No, I don't use it.		3	I use it frequently.		I use it occasionally.		I use it frequently.	I use it occasionally.							In the last week	3	40 USD	Content Creation (text, visuals, audio)	I have an intermediate level of proficiency.	Moderately important	I agree	I agree	I agree	I agree	I agree	I agree	I agree	I agree	I agree	I agree	I agree	I agree	I agree	I agree	I agree	I agree	I agree	I agree
2025-05-11 19:47:21	Woman	25	Master’s degree	Faculty of Theology, Master's Master’s degree	Konya	Yes, I use it.	Yes, I use it.	ChatGPT	No, I don't use it.		No, I don't use it.		3	I use it occasionally.	I use it occasionally.	I use it occasionally.	I never use it.	I never use it.	I never use it.	I never use it.	I never use it.	I never use it.	I never use it.	I never use it.	I never use it.	In the last week	1	I use it for free.	Education/Learning, Work/Professional Purposes, Daily Tasks (calendar, email, suggestions, etc.), Entertainment	I have an intermediate level of proficiency.	Moderately important	I agree	I'm undecided.	I'm undecided.	I agree	I agree	I agree	I agree	I absolutely agree.	I completely disagree.	I absolutely agree.	I agree	I agree	I agree	I agree	I agree	I'm undecided.	I agree	I'm undecided.
2025-05-11 20:41:28	Woman	18	Bachelor’s Master’s degree	International Relations, First Year	Corum	Yes, I use it.	Yes, I use it.	ChatGPT	No, I don't use it.		No, I don't use it.		2	I rarely use it.	I never use it.	I never use it.	I never use it.	I never use it.	I never use it.	I never use it.	I never use it.	I never use it.	I never use it.	I never use it.	I never use it.	In the last week	1	0	Education / Learning	I don't feel competent at all.	Moderately important	I'm undecided.	I agree	I agree	I agree	I agree	I completely disagree.	I completely disagree.	I agree	I completely disagree.	I completely disagree.	I agree	I agree	I'm undecided.	I agree	I agree	I'm undecided.	I'm undecided.	I agree
2025-05-11 23:16:29	Woman	24	Bachelor’s Master’s degree	Sociology - Graduate	Konya	Yes, I use it.	Yes, I use it.	ChatGPT, Gemini, Perplexity, Notebook LM	No, I don't use it.		No, I don't use it.		3	I use it frequently.	I use it occasionally.	I never use it.	I never use it.	I never use it.	I rarely use it.	I never use it.	I never use it.	I never use it.	I never use it.	I never use it.	I never use it.	In the last week	1	0	Content Creation (text, visuals, audio), Business/Professional Purposes, Daily Tasks (calendar, email, suggestions, etc.), Entertainment	I have an intermediate level of proficiency.	Important	I agree	I'm undecided.	I disagree.	I agree	I agree	I agree	I'm undecided.	I'm undecided.	I disagree.	I agree	I agree	I agree	I agree	I agree	I absolutely agree.	I agree	I agree	I'm undecided.
2025-05-11 23:58:00	Woman	32	Bachelor’s Master’s degree	Theology graduate	Konya	Yes, I use it.	Yes, I use it.	ChatGPT, DeepSeek, Grok, Copilot, Suno	No, I don't use it.		Yes, I use it.	Suno	4	I use it frequently.	I rarely use it.	I rarely use it.	I use it frequently.	I use it occasionally.								Today	1	I'm not paying	Education/Learning, Content Creation (text, visuals, audio), Business/Professional Purposes, Daily Tasks (calendar, email, suggestions, etc.)	I have some competence.	Moderately important	I disagree.	I disagree.	I'm undecided.	I agree	I agree	I agree	I'm undecided.	I absolutely agree.	I'm undecided.	I'm undecided.	I agree	I agree	I absolutely agree.	I absolutely agree.	I agree	I'm undecided.	I agree	I'm undecided.
2025-05-12 01:00:54	Woman	26	Bachelor’s Master’s degree	Law	Ankara	Yes, I use it.	Yes, I use it.	ChatGPT	No, I don't use it.		No, I don't use it.		5	I use it very often.	I never use it.	I never use it.	I never use it.	I never use it.	I never use it.	I never use it.	I never use it.	I never use it.	I never use it.	I never use it.	I never use it.	In the last week	1		Education/Learning, Content Creation (text, visuals, audio), Business/Professional Purposes, Daily Tasks (calendar, email, suggestions, etc.), Entertainment	I have an intermediate level of proficiency.	Important	I agree	I agree	I absolutely agree.	I absolutely agree.	I absolutely agree.	I absolutely agree.	I agree	I disagree.	I disagree.	I absolutely agree.	I absolutely agree.	I absolutely agree.	I absolutely agree.	I absolutely agree.	I absolutely agree.	I'm undecided.	I absolutely agree.	I absolutely agree.
2025-05-12 09:39:26	Male	37	Master’s degree	Physics department graduate	Konya	Yes, I use it.	Yes, I use it.	ChatGPT	No, I don't use it.		No, I don't use it.		1	I rarely use it.	I never use it.	I never use it.	I never use it.	I never use it.	I never use it.	I never use it.	I never use it.	I never use it.	I never use it.	I never use it.	I never use it.	In the last month	1		Business/Professional Purposes	I don't feel competent at all.	It's not very important.	I agree	I disagree.	I disagree.	I agree	I agree	I agree	I disagree.	I'm undecided.	I disagree.	I absolutely agree.	I agree	I agree	I agree	I disagree.	I agree	I agree	I agree	I'm undecided.
2025-05-12 11:14:44	Woman	24	Master’s degree	Radio, Television and Cinema Master's Program	Yozgat	Yes, I use it.	Yes, I use it.	ChatGPT, DeepSeek, Copilot	No, I don't use it.		No, I don't use it.		3	I use it frequently.	I never use it.	I use it occasionally.	I never use it.	I use it frequently.	I never use it.	I never use it.	I never use it.	I never use it.	I never use it.	I never use it.	I never use it.	In the last week	1	0	Education/Learning, Content Creation (text, visuals, audio), Entertainment	I have an intermediate level of proficiency.	Important	I agree	I agree	I agree	I absolutely agree.	I absolutely agree.	I absolutely agree.	I agree	I absolutely agree.	I disagree.	I absolutely agree.	I absolutely agree.	I absolutely agree.	I absolutely agree.	I absolutely agree.	I absolutely agree.	I absolutely agree.	I absolutely agree.	I absolutely agree.
2025-05-12 13:50:15	Woman	30	Master’s degree	Picture	Erzurum	No, I don't use it.
2025-05-13 17:25:30	Male	35	Master’s degree		Konya	Yes, I use it.	Yes, I use it.	ChatGPT, Gemini	No, I don't use it.		No, I don't use it.		3	I use it occasionally.	I use it occasionally.											In the last week	1	0 TL	Education/Learning, Work/Professional Purposes	I have some competence.	Moderately important	I agree	I'm undecided.	I agree	I'm undecided.	I agree	I agree	I agree	I agree	I completely disagree.	I absolutely agree.	I agree	I agree	I agree	I agree	I agree	I'm undecided.	I'm undecided.	I agree
2025-05-13 17:25:42	Male	31	Bachelor’s Master’s degree		Konya	Yes, I use it.	Yes, I use it.	ChatGPT	No, I don't use it.		No, I don't use it.		5	I use it very often.												Today	5	500 TL	Education/Learning, Work/Professional Purposes, Daily Tasks (calendar, email, suggestions, etc.), Entertainment	I am competent	Indispensable	I absolutely agree.	I agree	I agree	I absolutely agree.	I absolutely agree.	I absolutely agree.	I agree	I absolutely agree.	I completely disagree.	I absolutely agree.	I absolutely agree.	I absolutely agree.	I absolutely agree.	I absolutely agree.	I absolutely agree.	I absolutely agree.	I absolutely agree.	I absolutely agree.
2025-05-13 20:21:14	Male	22	Bachelor’s Master’s degree	Computer Engineering - 3rd year	Ankara	Yes, I use it.	Yes, I use it.	ChatGPT	Yes, I use it.	Midjourney, Dall-E, Kling	Yes, I use it.	Elevenlabs	4	I use it very often.	I use it occasionally.	I rarely use it.	I use it occasionally.	I use it occasionally.	I rarely use it.	I never use it.	I use it occasionally.	I rarely use it.	I use it frequently.	I never use it.	I never use it.	Today	2	79.2 USD	Content Creation (text, visuals, audio), Daily Tasks (calendar, email, recommendations, etc.), Entertainment	I am competent	Important	I agree	I'm undecided.	I agree	I agree	I agree	I agree	I agree	I absolutely agree.	I'm undecided.	I absolutely agree.	I absolutely agree.	I absolutely agree.	I absolutely agree.	I absolutely agree.	I absolutely agree.	I absolutely agree.	I absolutely agree.	I absolutely agree.
2025-05-13 20:52:07	Woman	18	Bachelor’s Master’s degree	Health Management 1st Year	Edirne	No, I don't use it.
2025-05-13 20:54:44	Male	23	Bachelor’s Master’s degree	Health Management - 4th Year	Edirne	Yes, I use it.	Yes, I use it.	ChatGPT, Gemini	Yes, I use it.	Midjourney, Sora	Yes, I use it.	Suno	3	I use it very often.	I use it occasionally.	I never use it.	I never use it.	I never use it.		I use it very often.	I never use it.	I never use it.	I never use it.	I use it frequently.	I never use it.	In the last week	1	250 TL	Education/Learning, Content Creation (text, visual, audio), Business/Professional Purposes, Entertainment	I am competent	Important	I absolutely agree.	I'm undecided.	I absolutely agree.	I absolutely agree.	I agree	I agree	I'm undecided.	I'm undecided.	I disagree.	I absolutely agree.	I absolutely agree.	I absolutely agree.	I absolutely agree.	I absolutely agree.	I absolutely agree.	I absolutely agree.	I absolutely agree.	I absolutely agree.
2025-05-13 21:18:46	Woman	37	Bachelor’s Master’s degree	Graphic design	Konya	Yes, I use it.	Yes, I use it.	ChatGPT, DeepSeek, Perplexity, Copilot	Yes, I use it.	Midjourney, Leonardo.ai, Kling	Yes, I use it.	Elevenlabs	2	I rarely use it.	I use it occasionally.	I use it frequently.	I use it very often.	I use it frequently.	I use it occasionally.	I rarely use it.	I use it occasionally.	I use it occasionally.	I rarely use it.	I rarely use it.	I use it occasionally.	In the last week	5	500	Education/Learning, Content Creation (text, visual, audio), Business/Professional Purposes, Recipes	I have an intermediate level of proficiency.	Indispensable	I absolutely agree.	I agree	I absolutely agree.	I absolutely agree.	I agree	I agree	I absolutely agree.	I absolutely agree.	I completely disagree.	I absolutely agree.	I absolutely agree.	I absolutely agree.	I absolutely agree.	I absolutely agree.	I absolutely agree.	I absolutely agree.	I absolutely agree.	I agree
2025-05-13 21:25:49	Male	21	Bachelor’s Master’s degree	Second year Theology student	Canakkale	No, I don't use it.
2025-05-13 21:38:26	Woman	23	Bachelor’s Master’s degree	Psychology - 3rd year	Istanbul	Yes, I use it.	Yes, I use it.	ChatGPT	No, I don't use it.		No, I don't use it.		5	I use it very often.	I never use it.	I never use it.	I never use it.	I rarely use it.	I never use it.	I never use it.	I never use it.	I never use it.	I never use it.	I never use it.	I never use it.	Today	5	20 USD	Education/Learning, Content Creation (text, visuals, audio)	I have an intermediate level of proficiency.	Indispensable	I absolutely agree.	I disagree.	I agree	I absolutely agree.	I agree	I absolutely agree.	I absolutely agree.	I absolutely agree.	I disagree.	I'm undecided.	I absolutely agree.	I absolutely agree.	I absolutely agree.	I absolutely agree.	I absolutely agree.	I'm undecided.	I absolutely agree.	I absolutely agree.
2025-05-13 22:46:01	Male	21	Bachelor’s Master’s degree	Mapping and cadastre - 2nd Year	Edirne	Yes, I use it.	Yes, I use it.	ChatGPT	Yes, I use it.	Midjourney	Yes, I use it.	MMAudio	3	I use it frequently.												In the last week	1	250 TL	Education / Learning	I have some competence.	It's not very important.	I agree	I'm undecided.	I agree	I'm undecided.	I agree	I agree	I'm undecided.	I agree	I'm undecided.	I agree	I'm undecided.	I'm undecided.	I'm undecided.	I'm undecided.	I'm undecided.	I'm undecided.	I'm undecided.	I'm undecided.
2025-05-13 23:51:49	Woman	23	Bachelor’s Master’s degree	Biomedical Device Technology - Graduate	Tekirdağ	Yes, I use it.	Yes, I use it.	ChatGPT, DeepSeek	Yes, I use it.	Midjourney	No, I don't use it.		4	I use it very often.	I rarely use it.	I use it occasionally.	I never use it.	I never use it.	I never use it.	I use it occasionally.	I never use it.	I never use it.	I never use it.	I never use it.	I never use it.	In the last week	1		Education/Learning, Content Creation (text, visuals, audio), Business/Professional Purposes, Daily Tasks (calendar, email, suggestions, etc.), Entertainment	I have an intermediate level of proficiency.	Moderately important	I agree	I agree	I agree	I agree	I agree	I absolutely agree.	I absolutely agree.	I agree	I'm undecided.	I absolutely agree.	I agree	I agree	I agree	I agree	I agree	I'm undecided.	I'm undecided.	I'm undecided.
2025-05-14 09:44:58	Male	22	Bachelor’s Master’s degree	Fourth-year Industrial Engineering student	Tekirdağ	Yes, I use it.	Yes, I use it.	ChatGPT, Gemini	No, I don't use it.		Yes, I use it.	Suno	5	I use it very often.	I use it very often.	I never use it.	I never use it.	I use it occasionally.	I never use it.	I never use it.	I never use it.	I never use it.	I never use it.	I never use it.	I never use it.	In the last week	1	0	Education/Learning, Daily Tasks (calendar, email, suggestions, etc.)	I am competent	Moderately important	I agree	I'm undecided.	I absolutely agree.	I absolutely agree.	I absolutely agree.	I agree	I agree	I'm undecided.	I'm undecided.	I'm undecided.	I agree	I absolutely agree.	I absolutely agree.	I absolutely agree.	I agree	I agree	I absolutely agree.	I absolutely agree.
2025-05-14 16:41:10	Woman	21	Bachelor’s Master’s degree	Public Relations and Promotion, 3rd Year	Konya	Yes, I use it.	Yes, I use it.	ChatGPT	Yes, I use it.	Kling	No, I don't use it.		5	I use it very often.												Today	1	0	Education/Learning, Content Creation (text, visuals, audio), Business/Professional Purposes, Daily Tasks (calendar, email, suggestions, etc.), Entertainment,	I don't feel competent at all.	Moderately important	I agree	I agree	I'm undecided.	I'm undecided.	I disagree.	I'm undecided.	I'm undecided.	I'm undecided.	I'm undecided.	I'm undecided.	I absolutely agree.	I absolutely agree.	I agree	I'm undecided.	I completely disagree.	I disagree.	I disagree.	I completely disagree.
2025-05-14 16:41:29	Woman	19	Bachelor’s Master’s degree	English Language and Literature - Preparatory Class	Gaziantep	Yes, I use it.	Yes, I use it.	ChatGPT, Gemini, Copilot	Yes, I use it.	Runway ML, Sora, Kling	Yes, I use it.	Elevenlabs	3	I use it frequently.	I use it occasionally.	I use it occasionally.	I use it occasionally.	I use it occasionally.	I rarely use it.	I rarely use it.	I never use it.	I rarely use it.	I rarely use it.		I use it occasionally.	In the last week	1		Education/Learning, Content Creation (text, visuals, audio), Business/Professional Purposes, Daily Tasks (calendar, email, suggestions, etc.)	I have an intermediate level of proficiency.	Moderately important	I agree	I disagree.	I'm undecided.	I agree	I agree	I agree	I agree	I'm undecided.	I disagree.	I agree	I agree	I agree	I'm undecided.	I agree	I agree	I disagree.	I agree	I agree
2025-05-14 17:51:34	Woman	18	Bachelor’s Master’s degree	Radio, Television and Cinema - 1st year	Konya	Yes, I use it.	Yes, I use it.	ChatGPT, Gemini	No, I don't use it.		No, I don't use it.		2	I rarely use it.	I rarely use it.	I never use it.	I never use it.	I never use it.	I never use it.	I never use it.	I never use it.	I never use it.	I never use it.	I never use it.	I never use it.	A long time ago	1		Education/Learning, Content Creation (text, visuals, audio), Business/Professional Purposes, Daily Tasks (calendar, email, suggestions, etc.),	I have an intermediate level of proficiency.	It doesn't matter at all.	I agree	I agree	I agree	I agree	I'm undecided.	I agree	I'm undecided.	I absolutely agree.	I completely disagree.	I absolutely agree.	I'm undecided.	I agree	I agree	I'm undecided.	I agree	I'm undecided.	I agree	I disagree.
2025-05-14 19:37:17	Male	21	Bachelor’s Master’s degree	Radio, Television and Cinema, 2nd Year	Konya	Yes, I use it.	Yes, I use it.	ChatGPT	No, I don't use it.		No, I don't use it.		2	I use it occasionally.	I rarely use it.	I never use it.	I never use it.	I never use it.	I never use it.	I never use it.	I never use it.	I never use it.	I never use it.	I never use it.	I never use it.	In the last week	1	00	Content Creation (text, visuals, audio)	I am competent	Moderately important	I'm undecided.	I'm undecided.	I'm undecided.	I'm undecided.	I absolutely agree.	I agree	I agree	I agree	I agree	I agree	I disagree.	I agree	I agree	I'm undecided.	I agree	I disagree.	I'm undecided.	I'm undecided.
2025-05-15 10:41:51	Woman	19	Bachelor’s Master’s degree	English Translation and Interpreting Preparation	Konya	Yes, I use it.	Yes, I use it.	ChatGPT, DeepSeek	Yes, I use it.	Midjourney, Flux, Leonardo.ai, Runway ML	Yes, I use it.	Suno, MMAudio	5	I use it very often.		I use it occasionally.	I rarely use it.	I rarely use it.			I use it occasionally.	I use it occasionally.		I rarely use it.	I rarely use it.	In the last week	1	0	Education/Learning, Content Creation (text, visuals, audio), Entertainment	I have an intermediate level of proficiency.	Important	I disagree.	I disagree.	I disagree.	I disagree.	I disagree.	I disagree.	I disagree.	I disagree.	I disagree.	I disagree.	I disagree.	I disagree.	I disagree.	I disagree.	I disagree.	I disagree.	I disagree.	I disagree.
2025-05-15 12:44:52	Male	21	Bachelor’s Master’s degree	Journalism - 2nd year	Konya	Yes, I use it.	Yes, I use it.	ChatGPT	No, I don't use it.		No, I don't use it.		2	I rarely use it.												In the last week	1		Education/Learning, Entertainment	I don't feel competent at all.	It doesn't matter at all.	I disagree.	I completely disagree.	I completely disagree.	I completely disagree.	I completely disagree.	I completely disagree.	I completely disagree.	I completely disagree.	I completely disagree.	I completely disagree.	I disagree.	I disagree.	I disagree.	I disagree.	I disagree.	I disagree.	I disagree.	I disagree.
2025-05-15 12:49:56	Woman	19	Bachelor’s Master’s degree	Radio, Television and Cinema - 1st year	Istanbul	Yes, I use it.	Yes, I use it.	ChatGPT, Yazeka	No, I don't use it.		No, I don't use it.		4	I use it very often.	I never use it.	I never use it.	I rarely use it.	I never use it.	I never use it.	I never use it.	I never use it.	I never use it.	I never use it.	I never use it.	I never use it.	Today	1	I use it without paying any fees.	For education/learning, content creation (text, visuals, audio), work/professional purposes, daily tasks (calendar, email, suggestions, etc.), and to organize my meals or calculate my daily calorie intake.	I am competent	Important	I agree	I agree	I agree	I absolutely agree.	I'm undecided.	I absolutely agree.	I absolutely agree.	I absolutely agree.	I'm undecided.	I agree	I absolutely agree.	I absolutely agree.	I absolutely agree.	I agree	I agree	I disagree.	I absolutely agree.	I absolutely agree.
2025-05-15 12:50:16	Woman	19	Bachelor’s Master’s degree	Radio, Television and Cinema, 1st Year	Konya	Yes, I use it.	Yes, I use it.	ChatGPT	No, I don't use it.		No, I don't use it.		2	I use it frequently.	I never use it.	I never use it.	I never use it.	I never use it.	I never use it.	I never use it.	I never use it.	I never use it.	I never use it.	I never use it.	I never use it.	In the last week	1	0	Education/Learning, Content Creation (text, visuals, audio)	I have an intermediate level of proficiency.	It's not very important.	I disagree.	I completely disagree.	I agree	I absolutely agree.	I completely disagree.	I disagree.	I completely disagree.	I completely disagree.	I disagree.	I disagree.	I agree	I agree	I disagree.	I'm undecided.	I agree	I agree	I agree	I'm undecided.
2025-05-15 21:58:33	Woman	33	Master’s degree	Astronomy and Space Sciences	Konya	Yes, I use it.	Yes, I use it.	ChatGPT, Grok	Yes, I use it.	Midjourney, Flux	No, I don't use it.		5	I use it very often.								I use it occasionally.				Today	1		Education/Learning, Work/Professional Purposes, Daily Tasks (calendar, email, suggestions, etc.), Entertainment	I have an intermediate level of proficiency.	Important	I agree	I agree	I agree	I absolutely agree.	I absolutely agree.	I agree	I agree	I'm undecided.	I disagree.	I'm undecided.	I absolutely agree.	I absolutely agree.	I absolutely agree.	I absolutely agree.	I absolutely agree.	I agree	I agree	I absolutely agree.
2025-05-16 13:32:14	Male	27	Doctoral degree		Konya	Yes, I use it.	Yes, I use it.	DeepSeek	Yes, I use it.	StableDiffusion	Yes, I use it.	Suno	4	I use it frequently.	I rarely use it.	I use it very often.	I never use it.	I use it frequently.	I never use it.	I never use it.	I never use it.	I never use it.	I never use it.	I use it frequently.	I use it occasionally.	Today	1		Education/Learning, Content Creation (text, visuals, audio), Business/Professional Purposes, Daily Tasks (calendar, email, suggestions, etc.)	I have an intermediate level of proficiency.	Moderately important	I'm undecided.	I agree	I agree	I absolutely agree.	I'm undecided.	I agree	I agree	I'm undecided.	I agree	I'm undecided.	I agree	I agree	I agree	I disagree.	I agree	I absolutely agree.	I absolutely agree.	I'm undecided.
2025-05-16 13:36:56	Male	22	Bachelor’s Master’s degree	RTV 2nd year	Konya	Yes, I use it.	Yes, I use it.	ChatGPT	No, I don't use it.		No, I don't use it.		2	I use it occasionally.	I never use it.	I never use it.	I never use it.	I never use it.	I never use it.	I never use it.	I never use it.	I never use it.	I never use it.	I never use it.	I never use it.	In the last week	1	0 TL	Education / Learning	I have some competence.	It's not very important.	I disagree.	I disagree.	I completely disagree.	I disagree.	I disagree.	I disagree.	I disagree.	I completely disagree.	I completely disagree.	I disagree.	I agree	I agree	I agree	I absolutely agree.	I agree	I'm undecided.	I agree	I absolutely agree.
2025-05-16 13:45:52	Male	25	Bachelor’s Master’s degree	Radio, television and cinema	Kırıkkale	No, I don't use it.
2025-05-16 13:49:58	Male	21	Bachelor’s Master’s degree	Radio, Television and Cinema, 2nd Year	Ankara	Yes, I use it.	Yes, I use it.	ChatGPT, Gemini, DeepSeek, Grok, Copilot	Yes, I use it.	Midjourney, Dall-E, Runway ML, Sora	Yes, I use it.	Elevenlabs, Suno	3	I use it very often.	I rarely use it.	I use it occasionally.	I use it occasionally.	I use it frequently.		I rarely use it.	I rarely use it.			I use it frequently.		Today	3	Item for sale: 220 TL :)	Education/Learning, Content Creation (text, visuals, audio), Business/Professional Purposes, Daily Tasks (calendar, email, suggestions, etc.), Entertainment	I have an intermediate level of proficiency.	Important	I agree	I agree	I agree	I absolutely agree.	I agree	I agree	I agree	I agree	I agree	I agree	I agree	I absolutely agree.	I absolutely agree.	I absolutely agree.	I agree	I absolutely agree.	I absolutely agree.	I'm undecided.
2025-05-16 13:50:51	Male	20	Bachelor’s Master’s degree	Radio, Television and Cinema, 2nd year	Konya	Yes, I use it.	Yes, I use it.	ChatGPT	No, I don't use it.		No, I don't use it.		3	I use it frequently.	I rarely use it.	I rarely use it.	I rarely use it.	I use it occasionally.	I never use it.	I never use it.	I never use it.	I never use it.	I never use it.	I use it occasionally.	I never use it.	In the last week	3	780 TL	Content Creation (text, visuals, audio), Business/Professional Purposes	I have an intermediate level of proficiency.	Important	I agree	I'm undecided.	I'm undecided.	I agree	I agree	I agree	I agree	I agree	I disagree.	I agree	I agree	I absolutely agree.	I agree	I'm undecided.	I absolutely agree.	I'm undecided.	I agree	I'm undecided.
2025-05-16 13:51:07	Woman	20	Bachelor’s Master’s degree	Radio, Television and Cinema - 2nd Year	Konya	Yes, I use it.	Yes, I use it.	ChatGPT, Gemini, Copilot	Yes, I use it.	Leonardo.ai,	No, I don't use it.		3	I use it frequently.	I rarely use it.	I never use it.	I never use it.	I use it frequently.	I never use it.	I never use it.	I never use it.	I never use it.	I never use it.	I never use it.	I never use it.	In the last week	3		Education/Learning, Content Creation (text, visuals, audio), Business/Professional Purposes, Daily Tasks (calendar, email, suggestions, etc.), Entertainment	I have an intermediate level of proficiency.	Moderately important	I absolutely agree.	I agree	I absolutely agree.	I'm undecided.	I absolutely agree.	I agree	I agree	I agree	I agree	I agree	I agree	I agree	I agree	I agree	I agree	I'm undecided.	I agree	I agree
2025-05-16 13:51:13	Woman	26	Bachelor’s Master’s degree	Radio, Television, and Cinema - 4th Grade	Ankara	Yes, I use it.	Yes, I use it.	ChatGPT, Gemini, DeepSeek	Yes, I use it.	Dall-E, Kling, Hailuo.ai	Yes, I use it.	Suno	5	I use it very often.	I use it frequently.	I use it frequently.	I never use it.	I never use it.	I rarely use it.	I never use it.	I use it occasionally.	I never use it.	I use it frequently.	I use it occasionally.	I never use it.	Today	2	350 TL	Education/Learning, Content Creation (text, visuals, audio)	I have an intermediate level of proficiency.	Moderately important	I agree	I'm undecided.	I agree	I agree	I'm undecided.	I'm undecided.	I agree	I agree	I agree	I agree	I agree	I agree	I agree	I'm undecided.	I'm undecided.	I agree	I absolutely agree.	I absolutely agree.
2025-05-16 13:52:16	Male	30	Bachelor’s Master’s degree	4	Ankara	Yes, I use it.	Yes, I use it.	ChatGPT, Gemini, DeepSeek, Copilot,	Yes, I use it.	Midjourney, Dall-E, Leonardo.ai, Sora, Kling	Yes, I use it.	Elevenlabs, Suno	5	I use it very often.	I use it occasionally.	I use it occasionally.	I never use it.	I use it occasionally.	I never use it.	I rarely use it.	I use it occasionally.	I use it occasionally.	I use it frequently.	I use it occasionally.	I never use it.	Today	3	500 TL	Content Creation (text, visuals, audio), Entertainment	I have an intermediate level of proficiency.	Important	I agree	I agree	I absolutely agree.	I absolutely agree.	I agree	I absolutely agree.	I absolutely agree.	I absolutely agree.	I absolutely agree.	I absolutely agree.	I absolutely agree.	I absolutely agree.	I absolutely agree.	I absolutely agree.	I absolutely agree.	I absolutely agree.	I absolutely agree.	I absolutely agree.
2025-05-16 13:52:24	Woman	20	Bachelor’s Master’s degree	Radio, Television, Cinema, 2nd Class	Konya	Yes, I use it.	Yes, I use it.	ChatGPT	Yes, I use it.	Runway ML, Kling	Yes, I use it.	Elevenlabs	5	I use it very often.	I never use it.	I never use it.	I never use it.	I never use it.	I never use it.	I never use it.	I never use it.	I never use it.	I use it occasionally.	I use it occasionally.	I use it occasionally.	In the last week	2	20 USD	Content Creation (text, visuals, audio), Business/Professional Purposes, Entertainment	I have some competence.	Important	I absolutely agree.	I disagree.	I absolutely agree.	I absolutely agree.	I absolutely agree.	I absolutely agree.	I absolutely agree.	I absolutely agree.	I completely disagree.	I absolutely agree.	I agree	I agree	I agree	I'm undecided.	I absolutely agree.	I absolutely agree.	I absolutely agree.	I'm undecided.
2025-05-16 13:52:46	Male	22	Bachelor’s Master’s degree	RTS 2	Adana	Yes, I use it.	Yes, I use it.	ChatGPT	No, I don't use it.		No, I don't use it.		2	I use it frequently.	I use it occasionally.	I never use it.	I never use it.	I never use it.	I never use it.	I never use it.	I never use it.	I never use it.	I never use it.	I never use it.	I never use it.	In the last month	1		Education / Learning	I have an intermediate level of proficiency.	Moderately important	I agree	I agree	I agree	I agree	I agree	I agree	I agree	I agree	I agree	I agree	I completely disagree.	I completely disagree.	I completely disagree.	I completely disagree.	I completely disagree.	I completely disagree.	I completely disagree.	I completely disagree.
2025-05-16 13:52:52	Woman	25	Master’s degree	Radio, Television and Cinema, 1st Year	Ankara	Yes, I use it.	Yes, I use it.	ChatGPT, DeepSeek	No, I don't use it.		No, I don't use it.		4	I use it very often.	I never use it.	I use it occasionally.	I never use it.	I never use it.	I never use it.	I never use it.	I never use it.	I never use it.	I never use it.		I never use it.	In the last week	3	500 TL	Education/Learning, Content Creation (text, visual, audio), Business/Professional Purposes	I have some competence.	Moderately important	I agree	I disagree.	I agree	I agree	I'm undecided.	I agree	I agree	I disagree.	I disagree.	I disagree.	I agree	I agree	I agree	I agree	I agree	I agree	I agree	I disagree.
2025-05-16 13:53:20	Male	20	Bachelor’s Master’s degree	Radio, Television and Cinema, 2nd Year	Ankara	Yes, I use it.	Yes, I use it.	ChatGPT, Grok	No, I don't use it.		No, I don't use it.		3	I use it frequently.	I never use it.	I never use it.	I use it frequently.	I never use it.	I never use it.	I never use it.	I never use it.	I never use it.	I never use it.	I never use it.	I never use it.	In the last week	1	0 TL	Education/Learning, Daily Tasks (calendar, email, suggestions, etc.), Entertainment	I am competent	Moderately important	I absolutely agree.	I absolutely agree.	I agree	I absolutely agree.	I absolutely agree.	I absolutely agree.	I absolutely agree.	I absolutely agree.	I completely disagree.	I absolutely agree.	I absolutely agree.	I absolutely agree.	I absolutely agree.	I absolutely agree.	I absolutely agree.	I absolutely agree.	I absolutely agree.	I absolutely agree.
2025-05-16 13:55:32	Male	26	Bachelor’s Master’s degree	Radio, Television and Cinema, 1st Year	Konya	Yes, I use it.	Yes, I use it.	ChatGPT, Gemini, DeepSeek, Copilot	No, I don't use it.		No, I don't use it.		3	I use it occasionally.	I rarely use it.	I use it occasionally.	I never use it.	I use it occasionally.	I never use it.	I never use it.	I never use it.	I never use it.	I never use it.	I never use it.	I never use it.	In the last month	3	200 TL	Education / Learning	I have an intermediate level of proficiency.	Moderately important	I absolutely agree.	I agree	I'm undecided.	I'm undecided.	I'm undecided.	I'm undecided.	I'm undecided.	I'm undecided.	I'm undecided.	I agree	I'm undecided.	I agree	I'm undecided.	I'm undecided.	I completely disagree.	I completely disagree.	I'm undecided.	I'm undecided.
2025-05-16 14:03:29	Woman	22	Bachelor’s Master’s degree	Radio, Cinema, TV, 3rd Grade	Konya	Yes, I use it.	Yes, I use it.	ChatGPT	No, I don't use it.		No, I don't use it.		4	I use it very often.	I use it occasionally.	I never use it.	I never use it.	I never use it.	I never use it.	I never use it.	I never use it.	I never use it.	I never use it.	I never use it.	I never use it.	Today	1	0 TL	Education / Learning	I am competent	Important	I agree	I'm undecided.	I agree	I absolutely agree.	I agree	I agree	I'm undecided.	I'm undecided.	I'm undecided.	I'm undecided.	I agree	I agree	I agree	I agree	I absolutely agree.	I'm undecided.	I agree	I'm undecided.
2025-05-16 14:05:03	Woman	20	Bachelor’s Master’s degree	Radio, Television and Cinema - 2nd Grade	Konya	Yes, I use it.	Yes, I use it.	ChatGPT	No, I don't use it.		No, I don't use it.		1	I use it occasionally.	I never use it.	I never use it.	I never use it.	I never use it.	I never use it.	I never use it.	I never use it.	I never use it.	I never use it.	I never use it.	I never use it.	In the last week	1	0 TL	Content Creation (text, visuals, audio), Daily Tasks (calendar, email, recommendations, etc.)	I have some competence.	It doesn't matter at all.	I completely disagree.	I completely disagree.	I agree	I disagree.	I'm undecided.	I absolutely agree.	I completely disagree.	I agree	I completely disagree.	I absolutely agree.	I disagree.	I agree	I'm undecided.	I agree	I disagree.	I'm undecided.	I agree	I disagree.
2025-05-16 14:30:03	Male	29	Master’s degree	Radio, Television and Cinema - Doctoral Coursework Period	Bursa	Yes, I use it.	Yes, I use it.	ChatGPT, Grok	Yes, I use it.	Midjourney, Leonardo.ai	Yes, I use it.	Elevenlabs	3	I use it occasionally.			I use it occasionally.			I use it occasionally.						In the last month	1		Content Creation (text, visuals, audio), Business/Professional Purposes	I have an intermediate level of proficiency.	Important	I agree	I'm undecided.	I agree	I absolutely agree.	I agree	I agree	I agree	I absolutely agree.	I completely disagree.	I absolutely agree.	I absolutely agree.	I absolutely agree.	I absolutely agree.	I absolutely agree.	I absolutely agree.	I agree	I agree	I'm undecided.
2025-05-16 15:04:46	Woman	23	Master’s degree	RTS 1st Term Master's	Konya	Yes, I use it.	Yes, I use it.	ChatGPT, Gemini, Perplexity	No, I don't use it.		No, I don't use it.		5	I use it very often.	I use it occasionally.	I never use it.	I never use it.	I never use it.	I use it occasionally.	I rarely use it.	I never use it.	I never use it.	I never use it.	I never use it.	I never use it.	Today	4	450	Education/Learning, Content Creation (text, visuals, audio), Business/Professional Purposes, Daily Tasks (calendar, email, suggestions, etc.), Entertainment	I am very competent.	Important	I agree	I'm undecided.	I absolutely agree.	I absolutely agree.	I agree	I'm undecided.	I absolutely agree.	I disagree.	I'm undecided.	I disagree.	I absolutely agree.	I absolutely agree.	I agree	I agree	I absolutely agree.	I'm undecided.	I agree	I agree
2025-05-16 15:17:49	Woman	26	Master’s degree	Communication science course period	Konya	Yes, I use it.	Yes, I use it.	ChatGPT, Gemini, Copilot	No, I don't use it.		No, I don't use it.		4	I use it frequently.	I use it frequently.	I never use it.	I rarely use it.	I use it occasionally.	I never use it.	I never use it.	I never use it.	I never use it.	I never use it.	I rarely use it.	I never use it.	In the last week	1		Education/Learning, Entertainment	I have an intermediate level of proficiency.	Important	I agree	I'm undecided.	I'm undecided.	I agree	I agree	I agree	I'm undecided.	I agree	I completely disagree.	I absolutely agree.	I agree	I agree	I agree	I absolutely agree.	I agree	I'm undecided.	I agree	I'm undecided.
2025-05-16 17:24:48	Woman	22	Bachelor’s Master’s degree	English Language and Literature - 3rd Year	Konya	Yes, I use it.	Yes, I use it.	ChatGPT, Perplexity	No, I don't use it.		No, I don't use it.		3	I use it frequently.	I never use it.	I never use it.	I never use it.	I never use it.	I use it occasionally.							In the last week	1		Education/Learning, Daily Tasks (calendar, email, suggestions, etc.), Entertainment	I have some competence.	It's not very important.	I agree	I disagree.	I absolutely agree.	I agree	I'm undecided.	I agree	I agree	I agree	I disagree.	I absolutely agree.	I absolutely agree.	I absolutely agree.	I agree	I agree	I'm undecided.	I disagree.	I'm undecided.	I'm undecided.
2025-05-16 17:40:56	Woman	22	Bachelor’s Master’s degree	RTS-3rd Class	Konya	Yes, I use it.	Yes, I use it.	ChatGPT, Gemini	No, I don't use it.		No, I don't use it.		3	I use it very often.	I use it occasionally.	I never use it.	I never use it.	I never use it.	I never use it.	I never use it.	I never use it.	I never use it.	I never use it.	I never use it.	I never use it.	Today	3		Education/Learning, Content Creation (text, visuals, audio)	I have an intermediate level of proficiency.	Moderately important	I'm undecided.	I'm undecided.	I absolutely agree.	I absolutely agree.	I absolutely agree.	I agree	I absolutely agree.	I'm undecided.	I absolutely agree.	I absolutely agree.	I absolutely agree.	I agree	I absolutely agree.	I agree	I agree	I agree	I agree	I agree
2025-05-16 23:41:15	Male	24	Bachelor’s Master’s degree	IT technical service	Ankara	Yes, I use it.	Yes, I use it.	ChatGPT, DeepSeek	Yes, I use it.	Midjourney	Yes, I use it.	Suno	1	I rarely use it.		I rarely use it.										In the last month	1	0	Entertainment, theories	I have some competence.	It's not very important.	I absolutely agree.	I disagree.	I'm undecided.	I agree	I absolutely agree.	I agree	I'm undecided.	I agree	I'm undecided.	I absolutely agree.	I agree	I agree	I absolutely agree.	I completely disagree.	I agree	I absolutely agree.	I absolutely agree.	I completely disagree.
2025-05-17 06:53:31	Male	23	Bachelor’s Master’s degree	Radio, Television and Cinema - Grade 4	Konya	Yes, I use it.	Yes, I use it.	ChatGPT, Gemini	No, I don't use it.		No, I don't use it.		4	I use it very often.	I rarely use it.	I rarely use it.	I rarely use it.	I rarely use it.	I never use it.	I never use it.	I never use it.	I never use it.	I never use it.	I never use it.	I never use it.	In the last week	1	0	Education/Learning, Daily Tasks (calendar, email, suggestions, etc.)	I have an intermediate level of proficiency.	Moderately important	I agree	I'm undecided.	I agree	I agree	I agree	I agree	I'm undecided.	I agree	I disagree.	I agree	I agree	I agree	I agree	I agree	I agree	I agree	I agree	I disagree.
2025-05-19 23:50:13	Male	44	Doctoral degree	RTV	Konya	Yes, I use it.	Yes, I use it.	ChatGPT, Gemini, Grok	Yes, I use it.	Midjourney, Dal-E, Flux	Yes, I use it.	Elevenlabs	4	I use it frequently.	I use it frequently.	I use it frequently.	I use it occasionally.	I use it occasionally.	I use it occasionally.	I use it occasionally.	I use it frequently.	I use it occasionally.	I use it occasionally.	I use it frequently.	I use it occasionally.	Today	5	500	Education/Learning, Content Creation (text, visual, audio), Business/Professional Purposes	I am very competent.	Important	I agree	I agree	I agree	I agree	I agree	I agree	I agree	I agree	I'm undecided.	I absolutely agree.	I absolutely agree.	I agree	I absolutely agree.	I absolutely agree.	I absolutely agree.	I absolutely agree.	I absolutely agree.	I absolutely agree.
2025-05-20 00:26:29	Male	43	Doctoral degree	RTV	Konya	Yes, I use it.	Yes, I use it.	ChatGPT	Yes, I use it.	Midjourney, Dal-E, Flux	Yes, I use it.	Elevenlabs	5	I rarely use it.	I use it occasionally.	I use it occasionally.	I rarely use it.	I rarely use it.	I use it frequently.	I use it frequently.	I use it occasionally.	I use it frequently.	I use it occasionally.	I use it occasionally.	I use it occasionally.	A long time ago	5	500	Business/Professional Purposes	I don't feel competent at all.	Moderately important	I agree	I agree	I agree	I agree	I agree	I agree	I agree	I agree	I agree	I agree	I agree	I agree	I agree	I agree	I agree	I agree	I agree	I agree
2025-05-20 21:37:01	Male	44	Master’s degree		Kirklareli	No, I don't use it.
2025-05-20 21:45:31	Woman	16	Bachelor’s Master’s degree	English language and literature	Kırklareli	Yes, I use it.	Yes, I use it.	ChatGPT, DeepSeek	No, I don't use it.		No, I don't use it.		5	I use it very often.		I use it occasionally.										Today	1	0	Daily Tasks (calendar, email, recommendations, etc.), Entertainment	I have an intermediate level of proficiency.	Moderately important	I absolutely agree.	I absolutely agree.	I agree	I absolutely agree.	I'm undecided.	I absolutely agree.	I absolutely agree.	I completely disagree.	I absolutely agree.	I disagree.	I absolutely agree.	I absolutely agree.	I absolutely agree.	I'm undecided.	I disagree.	I absolutely agree.	I absolutely agree.	I absolutely agree.
2025-05-20 21:48:40	Male	32	Master’s degree	Radio, Cinema and Television - graduate	Konya	Yes, I use it.	Yes, I use it.	ChatGPT, DeepSeek	Yes, I use it.	Midjourney, Kling	No, I don't use it.		4	I use it frequently.	I use it occasionally.	I use it occasionally.				I use it occasionally.			I use it occasionally.			In the last week	4	Average price: 3500 TL	Education/Learning, Content Creation (text, visuals, audio)	I have an intermediate level of proficiency.	Moderately important	I'm undecided.	I'm undecided.	I agree	I agree	I'm undecided.	I agree	I agree	I agree	I agree	I agree	I'm undecided.	I agree	I agree	I agree	I agree	I agree	I agree	I agree
2025-05-20 21:53:43	Male	31	Bachelor’s Master’s degree	Business	Konya	No, I don't use it.
2025-05-20 22:07:42	Male	45	Doctoral degree	Cartoon and animation	Eskisehir	Yes, I use it.	Yes, I use it.	ChatGPT, Gemini, DeepSeek, Claude ai	Yes, I use it.	Dall-E, Runway ML, Sora, Kling	No, I don't use it.		5	I use it occasionally.	I use it occasionally.	I never use it.	I never use it.	I never use it.	I never use it.	I never use it.	I use it occasionally.	I never use it.	I never use it.	I rarely use it.	I rarely use it.	Today	3	1200	Education/Learning, Content Creation (text, visuals, audio), Business/Professional Purposes, Daily Tasks (calendar, email, suggestions, etc.), Entertainment	I am very competent.	Important	I absolutely agree.	I absolutely agree.	I absolutely agree.	I absolutely agree.	I absolutely agree.	I absolutely agree.	I absolutely agree.	I agree	I'm undecided.	I'm undecided.	I absolutely agree.	I absolutely agree.	I absolutely agree.	I absolutely agree.	I absolutely agree.	I absolutely agree.	I absolutely agree.	I agree
2025-05-20 22:21:41	Woman	42	Bachelor’s Master’s degree	labor economics	Kırklareli	Yes, I use it.	Yes, I use it.	ChatGPT, Gemini	No, I don't use it.		No, I don't use it.		2	I use it occasionally.	I rarely use it.	I never use it.	I never use it.	I never use it.	I never use it.	I never use it.	I never use it.	I never use it.	I never use it.	I never use it.	I never use it.	In the last week	1	0	Education/Learning, Content Creation (text, visuals, audio), Daily Tasks (calendar, email, suggestions, etc.)	I have an intermediate level of proficiency.	Important	I agree	I agree	I agree	I agree	I agree	I agree	I agree	I'm undecided.	I agree	I agree	I absolutely agree.	I absolutely agree.	I absolutely agree.	I absolutely agree.	I absolutely agree.	I agree	I absolutely agree.	I agree
2025-05-20 23:51:20	Male	30	Bachelor’s Master’s degree	Electrical and electronic engineering	Konya	Yes, I use it.	Yes, I use it.	ChatGPT	Yes, I use it.	Midjourney	Yes, I use it.	Elevenlabs	4	I use it frequently.												Today	1		Education / Learning	I am competent	Moderately important	I'm undecided.	I'm undecided.	I'm undecided.	I'm undecided.	I'm undecided.	I'm undecided.	I'm undecided.	I'm undecided.	I'm undecided.	I'm undecided.	I'm undecided.	I'm undecided.	I'm undecided.	I'm undecided.	I'm undecided.	I'm undecided.	I'm undecided.	I'm undecided.
2025-05-21 00:34:52	Male	31	Bachelor’s Master’s degree	Public administration	Konya	Yes, I use it.	Yes, I use it.	ChatGPT	Yes, I use it.	Leonardo.ai, Kling	Yes, I use it.	Elevenlabs	5	I use it very often.	I never use it.	I never use it.	I never use it.	I rarely use it.	I never use it.	I never use it.	I never use it.	I never use it.	I use it very often.	I never use it.	I rarely use it.	Today	3	1500 TL	Content Creation (text, visuals, audio)	I have an intermediate level of proficiency.	Important	I agree	I agree	I agree	I agree	I agree	I agree	I agree	I agree	I completely disagree.	I agree	I agree	I agree	I agree	I agree	I agree	I agree	I agree	I agree
2025-05-22 11:01:55	Male	33	Bachelor’s Master’s degree	Social Studies Teacher - Graduate	Konya	No, I don't use it.
2025-05-22 11:05:56	Male	32	Master’s degree	Master's Master’s degree in Management Information Systems	Konya	Yes, I use it.	Yes, I use it.	ChatGPT, Gemini, Grok, Copilot,	Yes, I use it.	Midjourney, Dall-E, Flux, Leonardo.ai, Runway ML, Sora, Kling	Yes, I use it.	Elevenlabs, Suno	5	I use it very often.	I use it frequently.		I use it very often.			I use it frequently.	I use it frequently.	I use it frequently.	I use it frequently.	I use it frequently.	I use it frequently.	Today	5	120 USD	Education/Learning, Content Creation (text, visual, audio), Business/Professional Purposes	I am competent	Important	I agree	I agree	I agree	I agree	I agree	I agree	I agree	I agree	I agree	I agree	I agree	I agree	I agree	I agree	I agree	I agree	I agree	I agree
2025-05-26 16:01:30	Woman	45	Doctoral degree	MEDICAL FACULTY - GRADUATE	Konya	Yes, I use it.	Yes, I use it.	ChatGPT, DeepSeek	Yes, I use it.	Sora	No, I don't use it.		4	I use it frequently.	I never use it.	I use it occasionally.	I never use it.	I never use it.	I never use it.	I never use it.	I never use it.	I never use it.	I never use it.	I use it occasionally.	I never use it.	Today	4	20 USD	Education/Learning, Work/Professional Purposes	I am competent	Moderately important	I agree	I agree	I agree	I agree	I agree	I agree	I agree	I agree	I disagree.	I agree	I agree	I agree	I agree	I agree	I agree	I agree	I agree	I agree
2025-05-26 16:07:07	Male	28	Bachelor’s Master’s degree	Turkish Language Teaching Faculty of Education	Kırıkkale	No, I don't use it.
2025-05-26 16:09:59	Male	23	Bachelor’s Master’s degree	Literature, 3rd Grade	Kırıkkale	Yes, I use it.	No, I don't use it.		No, I don't use it.		Yes, I use it.	Suno	2	I use it frequently.	I never use it.	I never use it.	I never use it.	I rarely use it.	I use it occasionally.	I use it occasionally.	I use it occasionally.	I never use it.	I never use it.	I never use it.	I never use it.	In the last week	1	25	Education/Learning, Work/Professional Purposes	I have some competence.	Moderately important	I completely disagree.	I disagree.	I disagree.	I completely disagree.	I completely disagree.	I disagree.	I disagree.	I completely disagree.	I disagree.	I disagree.	I completely disagree.	I disagree.	I disagree.	I completely disagree.	I completely disagree.	I completely disagree.	I disagree.	I disagree.
2025-05-26 16:11:10	Male	23	Master’s degree	Master's Master’s degree in health management	Hatay	Yes, I use it.	Yes, I use it.	ChatGPT, Grok	No, I don't use it.		Yes, I use it.	Suno	3	I use it frequently.	I use it occasionally.	I use it frequently.	I use it very often.	I use it occasionally.	I never use it.	I never use it.	I never use it.	I never use it.	I never use it.	I never use it.	I never use it.	In the last week	1	0	Education/Learning, Daily Tasks (calendar, email, suggestions, etc.), Entertainment	I have an intermediate level of proficiency.	Moderately important	I agree	I agree	I agree	I agree	I agree	I absolutely agree.	I agree	I agree	I agree	I agree	I agree	I agree	I absolutely agree.	I absolutely agree.	I agree	I agree	I agree	I agree
2025-05-26 16:13:37	Male	24	Bachelor’s Master’s degree	Political Science and Public Administration - 4th Year	Kırıkkale	Yes, I use it.	Yes, I use it.	ChatGPT	No, I don't use it.		No, I don't use it.		4	I use it frequently.	I never use it.	I never use it.	I never use it.	I never use it.	I never use it.	I never use it.	I never use it.	I never use it.	I never use it.	I never use it.	I never use it.	In the last week	1	0 TL	Education/Learning, Entertainment	I have an intermediate level of proficiency.	It's not very important.	I agree	I agree	I agree	I agree	I agree	I agree	I agree	I'm undecided.	I'm undecided.	I absolutely agree.	I agree	I absolutely agree.	I absolutely agree.	I absolutely agree.	I absolutely agree.	I absolutely agree.	I absolutely agree.	I absolutely agree.
2025-05-26 16:13:59	Woman	44	Doctoral degree	Medical Genetics Assistant, Year 2		Yes, I use it.	Yes, I use it.	ChatGPT	No, I don't use it.		No, I don't use it.		4	I use it very often.												In the last week	1		Education/Learning, Work/Professional Purposes, Daily Tasks (calendar, email, suggestions, etc.)	I have some competence.	Important	I disagree.	I disagree.	I'm undecided.	I agree	I disagree.	I'm undecided.	I'm undecided.	I'm undecided.	I agree	I'm undecided.	I agree	I agree	I agree	I'm undecided.	I absolutely agree.	I absolutely agree.	I absolutely agree.	I agree
2025-05-26 16:14:06	Male	23	Bachelor’s Master’s degree	Nursing - 3rd year	Kırıkkale	Yes, I use it.	Yes, I use it.	ChatGPT	No, I don't use it.		No, I don't use it.		2	I rarely use it.												In the last month	1	0 TL	Education / Learning	I have an intermediate level of proficiency.	It's not very important.	I'm undecided.	I'm undecided.	I'm undecided.	I'm undecided.	I'm undecided.	I'm undecided.	I'm undecided.	I'm undecided.	I'm undecided.	I'm undecided.	I agree	I agree	I agree	I agree	I agree	I agree	I agree	I agree
2025-05-26 16:14:48	Male	25	Bachelor’s Master’s degree	History	Kırıkkale	Yes, I use it.	Yes, I use it.	ChatGPT	Yes, I use it.	Midjourney	Yes, I use it.	Elevenlabs	5	I use it very often.	I use it occasionally.	I use it occasionally.	I use it frequently.	I use it frequently.	I use it frequently.	I use it frequently.	I use it occasionally.	I use it occasionally.	I use it occasionally.	I use it occasionally.	I use it occasionally.	Today	5	0	Education / Learning	I don't feel competent at all.	It doesn't matter at all.	I'm undecided.	I'm undecided.	I'm undecided.	I'm undecided.	I'm undecided.	I'm undecided.	I'm undecided.	I disagree.	I disagree.	I disagree.	I disagree.	I completely disagree.	I disagree.	I disagree.	I disagree.	I disagree.	I disagree.	I disagree.
2025-05-26 16:15:37	Male	28	Bachelor’s Master’s degree	Computer engineering	Kırıkkale	Yes, I use it.	Yes, I use it.	Grok	Yes, I use it.	Midjourney, Dall-E, Flux, Leonardo.ai, Runway ML	Yes, I use it.	Suno, MMAudio	5	I rarely use it.	I use it occasionally.	I rarely use it.	I use it occasionally.	I rarely use it.	I rarely use it.	I never use it.	I never use it.	I rarely use it.	I never use it.	I use it occasionally.	I never use it.	Today	1	20 USD	Education/Learning, Work/Professional Purposes, Daily Tasks (calendar, email, suggestions, etc.)	I have an intermediate level of proficiency.	Moderately important	I disagree.	I disagree.	I completely disagree.	I completely disagree.	I completely disagree.	I disagree.	I completely disagree.	I disagree.	I disagree.	I completely disagree.	I disagree.	I completely disagree.	I completely disagree.	I completely disagree.	I completely disagree.	I completely disagree.	I disagree.	I disagree.
2025-05-26 16:16:34	Male	27	Bachelor’s Master’s degree	Rail systems	Ankara	No, I don't use it.
2025-05-26 16:16:48	Woman	22	Bachelor’s Master’s degree	Radio and Television 4th Grade	Konya	Yes, I use it.	Yes, I use it.	ChatGPT, Gemini	Yes, I use it.	Sora	Yes, I use it.	Suno	4	I use it very often.	I use it occasionally.	I never use it.	I never use it.	I rarely use it.	I never use it.	I never use it.	I never use it.	I never use it.	I never use it.	I use it occasionally.	I never use it.	In the last week	1	0	Education/Learning, Content Creation (text, visuals, audio), Business/Professional Purposes, Daily Tasks (calendar, email, suggestions, etc.), Entertainment	I have an intermediate level of proficiency.	Moderately important	I'm undecided.	I'm undecided.	I agree	I absolutely agree.	I absolutely agree.	I absolutely agree.	I agree	I'm undecided.	I'm undecided.	I absolutely agree.	I agree	I absolutely agree.	I absolutely agree.	I absolutely agree.	I agree	I disagree.	I agree	I'm undecided.
2025-05-26 16:17:28	Male	19	Bachelor’s Master’s degree	Finance	Konya	Yes, I use it.	No, I don't use it.		Yes, I use it.	Midjourney, Dall-E, Flux, Leonardo.ai, Runway ML, Sora, Kling	No, I don't use it.		3	I use it frequently.	I use it frequently.	I never use it.	I never use it.	I never use it.	I never use it.	I never use it.	I never use it.	I never use it.	I never use it.	I never use it.	I never use it.	Today	1		Education/Learning, Content Creation (text, visuals, audio), Business/Professional Purposes, Daily Tasks (calendar, email, suggestions, etc.), Entertainment	I have an intermediate level of proficiency.	Moderately important	I completely disagree.	I completely disagree.	I completely disagree.	I disagree.	I completely disagree.	I completely disagree.	I completely disagree.	I completely disagree.	I completely disagree.	I completely disagree.	I absolutely agree.	I absolutely agree.	I absolutely agree.	I absolutely agree.	I absolutely agree.	I absolutely agree.	I absolutely agree.	I absolutely agree.
2025-05-26 16:23:39	Male	22	Bachelor’s Master’s degree	Computer programming	Ankara	Yes, I use it.	Yes, I use it.	ChatGPT, DeepSeek, Grok	Yes, I use it.	Midjourney	Yes, I use it.	MMAudio	5	I use it very often.		I use it frequently.	I use it occasionally.									Today	3	30USD	Education/Learning, Content Creation (text, visual, audio), Business/Professional Purposes	I have an intermediate level of proficiency.	Important	I agree	I agree	I agree	I agree	I agree	I absolutely agree.	I agree	I agree	I completely disagree.	I absolutely agree.	I agree	I agree	I'm undecided.	I agree	I agree	I disagree.	I disagree.	I absolutely agree.
2025-05-26 16:24:53	Male	20	Bachelor’s Master’s degree	Computer Engineering - 4th Year	Ankara	No, I don't use it.
2025-05-26 16:26:58	Woman	21	Bachelor’s Master’s degree	Justice	Ankara	Yes, I use it.	Yes, I use it.	ChatGPT	No, I don't use it.		No, I don't use it.		3	I use it frequently.	I use it occasionally.	I never use it.	I never use it.	I never use it.	I never use it.	I never use it.	I never use it.	I never use it.	I never use it.	I never use it.	I never use it.	In the last week	1	I'm not paying	Education/Learning, Content Creation (text, visual, audio), Business/Professional Purposes	I have an intermediate level of proficiency.	Moderately important	I absolutely agree.	I'm undecided.	I agree	I agree	I'm undecided.	I absolutely agree.	I absolutely agree.	I absolutely agree.	I completely disagree.	I absolutely agree.	I absolutely agree.	I absolutely agree.	I absolutely agree.	I absolutely agree.	I absolutely agree.	I'm undecided.	I absolutely agree.	I absolutely agree.
2025-05-26 16:29:55	Male	25	Bachelor’s Master’s degree	Computer Engineering - 4th Year	Kırıkkale	Yes, I use it.	Yes, I use it.	ChatGPT, Gemini, Copilot	No, I don't use it.		No, I don't use it.		3	I use it occasionally.	I use it occasionally.	I never use it.	I never use it.	I use it occasionally.	I never use it.	I rarely use it.	I never use it.	I never use it.		I never use it.	I never use it.	In the last month	1		Education/Learning, Content Creation (text, visuals, audio)	I have an intermediate level of proficiency.	It's not very important.	I agree	I agree	I agree	I agree	I agree	I agree	I agree	I agree	I agree	I agree	I agree	I agree	I agree	I agree	I agree	I agree	I agree	I agree
2025-05-26 16:31:06	Woman	51	Bachelor’s Master’s degree	AÖF Social Sciences 1st Year	Ankara	No, I don't use it.
2025-05-26 16:32:21	Male	28	Bachelor’s Master’s degree		Kırıkkale	No, I don't use it.
2025-05-26 16:37:38	Male	24	Bachelor’s Master’s degree	Civil Engineering - 4th Year	Kırıkkale	No, I don't use it.
2025-05-26 16:40:29	Woman	26	Bachelor’s Master’s degree	Radio, Television and Cinema - 4th year	Ankara	Yes, I use it.	Yes, I use it.	ChatGPT, DeepSeek, Copilot	Yes, I use it.	Sora, Kling	Yes, I use it.	Suno	4	I use it frequently.	I use it occasionally.	I use it frequently.	I rarely use it.	I use it frequently.	I never use it.	I never use it.	I rarely use it.	I never use it.	I use it frequently.	I use it occasionally.	I never use it.	Today	2	400+	Education/Learning, Content Creation (text, visuals, audio), Daily Tasks (calendar, email, suggestions, etc.)	I have some competence.	Important	I'm undecided.	I'm undecided.	I agree	I absolutely agree.	I agree	I agree	I agree	I agree	I completely disagree.	I absolutely agree.	I absolutely agree.	I absolutely agree.	I absolutely agree.	I agree	I absolutely agree.	I agree	I absolutely agree.	I agree
2025-05-26 16:45:06	Male	25	Bachelor’s Master’s degree	BESYO 2	Konya	Yes, I use it.	Yes, I use it.	ChatGPT, Gemini, DeepSeek, Perplexity	Yes, I use it.	Midjourney, Dall-E, Runway ML, Sora	Yes, I use it.	Elevenlabs, MMAudio	5	I use it very often.	I use it occasionally.			I use it occasionally.				I use it occasionally.				In the last week	1	300 TL	Education/Learning, Work/Professional Purposes	I am competent	Indispensable	I absolutely agree.	I absolutely agree.	I absolutely agree.	I absolutely agree.	I absolutely agree.	I absolutely agree.	I absolutely agree.	I absolutely agree.	I absolutely agree.	I absolutely agree.	I absolutely agree.	I absolutely agree.	I absolutely agree.	I absolutely agree.	I absolutely agree.	I absolutely agree.	I absolutely agree.	I absolutely agree.
2025-05-26 16:45:29	Male	32	Bachelor’s Master’s degree	Radio and television	Konya	Yes, I use it.	Yes, I use it.	ChatGPT	Yes, I use it.	Midjourney	Yes, I use it.	Elevenlabs	3	I rarely use it.	I use it occasionally.	I rarely use it.	I rarely use it.	I use it occasionally.		I rarely use it.	I rarely use it.	I never use it.	I rarely use it.	I use it occasionally.	I rarely use it.	In the last week	2	500 TL	Content Creation (text, visuals, audio)	I have an intermediate level of proficiency.	Important	I agree	I agree	I agree	I agree	I agree	I agree	I agree	I agree	I completely disagree.	I absolutely agree.	I absolutely agree.	I absolutely agree.	I absolutely agree.	I absolutely agree.	I absolutely agree.	I absolutely agree.	I absolutely agree.	I agree
2025-05-26 16:57:24	Woman	21	Bachelor’s Master’s degree	Political Science and International Relations, 1st Year	Istanbul	Yes, I use it.	Yes, I use it.	ChatGPT, DeepSeek	No, I don't use it.		No, I don't use it.		5	I use it very often.	I never use it.	I rarely use it.	I never use it.	I never use it.	I never use it.	I never use it.	I never use it.	I never use it.	I never use it.	I never use it.	I never use it.	Today	4	500 TL	Education/Learning, Content Creation (text, visuals, audio)	I have an intermediate level of proficiency.	Important	I agree	I'm undecided.	I absolutely agree.	I agree	I'm undecided.	I'm undecided.	I agree	I disagree.	I'm undecided.	I'm undecided.	I absolutely agree.	I absolutely agree.	I absolutely agree.	I agree	I agree	I agree	I'm undecided.	I disagree.
2025-05-26 16:59:35	Woman	21	Bachelor’s Master’s degree	Management Information Systems - 4th Year	Ankara	Yes, I use it.	Yes, I use it.	ChatGPT, Gemini, DeepSeek, Grok, Copilot	Yes, I use it.	Midjourney, Dal-E, Flux	Yes, I use it.	Elevenlabs, Suno	4	I use it frequently.	I use it frequently.	I use it frequently.	I use it occasionally.	I use it occasionally.	I use it occasionally.	I use it occasionally.	I use it occasionally.	I rarely use it.	I rarely use it.	I use it occasionally.	I use it occasionally.	In the last week	1		Education/Learning, Content Creation (text, visuals, audio), Daily Tasks (calendar, email, suggestions, etc.)	I am competent	Important	I'm undecided.	I'm undecided.	I'm undecided.	I'm undecided.	I'm undecided.	I'm undecided.	I'm undecided.	I'm undecided.	I'm undecided.	I'm undecided.	I'm undecided.	I'm undecided.	I'm undecided.	I'm undecided.	I'm undecided.	I'm undecided.	I'm undecided.	I'm undecided.
2025-05-26 17:23:19	Male	26	Bachelor’s Master’s degree	Chemical engineering	Kırıkkale	Yes, I use it.	Yes, I use it.	ChatGPT, Gemini	No, I don't use it.		No, I don't use it.		3	I use it frequently.	I use it frequently.	I use it occasionally.	I use it occasionally.	I use it occasionally.	I use it occasionally.							Today	1	15 USD	Education / Learning	I have some competence.	Moderately important	I completely disagree.	I completely disagree.	I completely disagree.	I disagree.	I disagree.	I disagree.	I completely disagree.	I completely disagree.	I completely disagree.	I completely disagree.	I agree	I agree	I agree	I agree	I agree	I agree	I agree	I agree
2025-05-26 17:41:55	Male	31	Doctoral degree	Medical Faculty/Medical Genetics	Konya	Yes, I use it.	Yes, I use it.	ChatGPT, DeepSeek	No, I don't use it.		No, I don't use it.		4	I use it frequently.	I never use it.	I use it frequently.	I never use it.	I never use it.	I never use it.	I never use it.	I never use it.	I never use it.	I never use it.	I never use it.	I never use it.	Today	1	0	Education/Learning, Content Creation (text, visual, audio), Business/Professional Purposes	I have an intermediate level of proficiency.	Important	I agree	I'm undecided.	I agree	I agree	I'm undecided.	I agree	I agree	I agree	I agree	I agree	I agree	I agree	I agree	I agree	I agree	I agree	I agree	I agree
2025-05-26 17:48:34	Woman	22	Bachelor’s Master’s degree	Second year of Industrial Engineering	Aksaray	Yes, I use it.	Yes, I use it.	ChatGPT, DeepSeek	No, I don't use it.		No, I don't use it.		5	I use it very often.	I use it occasionally.	I use it frequently.	I use it occasionally.	I never use it.	I never use it.	I never use it.	I never use it.	I never use it.	I never use it.	I never use it.	I never use it.	Today	4	500 TL	Education/Learning, Content Creation (text, visuals, audio), Entertainment	I am competent	Indispensable	I agree	I agree	I agree	I agree	I agree	I agree	I agree	I'm undecided.	I disagree.	I agree	I agree	I absolutely agree.	I absolutely agree.	I absolutely agree.	I agree	I'm undecided.	I agree	I agree
2025-05-26 18:00:40	Woman	23	Bachelor’s Master’s degree	Speech and Language Therapy, 4th Year	Istanbul	Yes, I use it.	Yes, I use it.	ChatGPT	No, I don't use it.		No, I don't use it.		4	I use it frequently.	I never use it.	I never use it.	I never use it.	I never use it.	I never use it.	I never use it.	I never use it.	I never use it.	I never use it.	I never use it.	I never use it.	Today	2	200	Education/Learning, Work/Professional Purposes, Daily Tasks (calendar, email, suggestions, etc.), Entertainment	I am competent	Important	I'm undecided.	I agree	I agree	I agree	I agree	I agree	I agree	I'm undecided.	I agree	I'm undecided.	I agree	I agree	I agree	I agree	I agree	I agree	I agree	I agree
2025-05-26 18:26:08	Male	27	Bachelor’s Master’s degree		Ankara	Yes, I use it.	Yes, I use it.	ChatGPT	No, I don't use it.		No, I don't use it.		1	I rarely use it.	I never use it.	I never use it.	I never use it.	I never use it.	I never use it.	I never use it.	I never use it.	I never use it.	I never use it.	I never use it.	I never use it.	A long time ago	1	0	Education / Learning	I have an intermediate level of proficiency.	It's not very important.	I'm undecided.	I'm undecided.	I'm undecided.	I'm undecided.	I'm undecided.	I'm undecided.	I'm undecided.	I'm undecided.	I'm undecided.	I'm undecided.	I'm undecided.	I'm undecided.	I'm undecided.	I'm undecided.	I'm undecided.	I'm undecided.	I'm undecided.	I'm undecided.
2025-05-26 18:26:16	Male	27	Bachelor’s Master’s degree		Ankara	Yes, I use it.	Yes, I use it.	ChatGPT	No, I don't use it.		No, I don't use it.		1	I rarely use it.	I never use it.	I never use it.	I never use it.	I never use it.	I never use it.	I never use it.	I never use it.	I never use it.	I never use it.	I never use it.	I never use it.	A long time ago	1	0	Education / Learning	I have an intermediate level of proficiency.	It's not very important.	I'm undecided.	I'm undecided.	I'm undecided.	I'm undecided.	I'm undecided.	I'm undecided.	I'm undecided.	I'm undecided.	I'm undecided.	I'm undecided.	I'm undecided.	I'm undecided.	I'm undecided.	I'm undecided.	I'm undecided.	I'm undecided.	I'm undecided.	I'm undecided.
2025-05-26 18:38:42	Male	26	Bachelor’s Master’s degree		Kırıkkale	No, I don't use it.
2025-05-26 19:17:13	Woman	25	Bachelor’s Master’s degree	Urban and regional planning - graduate	Ankara	Yes, I use it.	Yes, I use it.	ChatGPT, Grok	No, I don't use it.		Yes, I use it.	Elevenlabs, Suno, MMAudio	4	I use it very often.	I rarely use it.	I rarely use it.	I use it very often.	I rarely use it.	I rarely use it.	I rarely use it.	I rarely use it.	I rarely use it.	I rarely use it.	I rarely use it.	I rarely use it.	Today	1		Education/Learning, Work/Professional Purposes, Daily Tasks (calendar, email, suggestions, etc.), Entertainment	I am very competent.	Important	I absolutely agree.	I absolutely agree.	I absolutely agree.	I absolutely agree.	I absolutely agree.	I absolutely agree.	I absolutely agree.	I absolutely agree.	I absolutely agree.	I absolutely agree.	I absolutely agree.	I absolutely agree.	I absolutely agree.	I absolutely agree.	I absolutely agree.	I absolutely agree.	I absolutely agree.	I absolutely agree.
2025-05-26 19:33:40	Male	27	Bachelor’s Master’s degree	Food technology	Ankara	Yes, I use it.	Yes, I use it.	ChatGPT	No, I don't use it.		No, I don't use it.		2	I use it frequently.	I never use it.	I never use it.	I never use it.	I never use it.	I never use it.	I never use it.	I never use it.	I never use it.	I never use it.	I never use it.	I never use it.	In the last week	1	0	Business/Professional Purposes	I have an intermediate level of proficiency.	Moderately important	I agree	I absolutely agree.	I agree	I absolutely agree.	I agree	I agree	I agree	I agree	I completely disagree.	I absolutely agree.	I absolutely agree.	I absolutely agree.	I absolutely agree.	I absolutely agree.	I absolutely agree.	I absolutely agree.	I absolutely agree.	I absolutely agree.
2025-05-26 19:40:47	Woman	21	Bachelor’s Master’s degree	Computer Engineering 3	Ankara	Yes, I use it.	Yes, I use it.	ChatGPT, Gemini	No, I don't use it.		Yes, I use it.	Elevenlabs, MMAudio	4	I use it frequently.	I use it occasionally.	I rarely use it.	I never use it.	I never use it.	I never use it.	I never use it.	I never use it.	I never use it.	I never use it.	I never use it.	I never use it.	In the last week	1		Education/Learning, Daily Tasks (calendar, email, suggestions, etc.), Entertainment	I have an intermediate level of proficiency.	Moderately important	I agree	I agree	I agree	I agree	I absolutely agree.	I absolutely agree.	I absolutely agree.	I absolutely agree.	I absolutely agree.	I absolutely agree.	I agree	I agree	I agree	I agree	I agree	I agree	I agree	I agree
2025-05-26 21:09:46	Woman	44	Doctoral degree		Konya	Yes, I use it.	Yes, I use it.	ChatGPT	No, I don't use it.		No, I don't use it.		4	I use it occasionally.												Today	1		Education / Learning	I am very competent.	Important	I agree	I agree	I agree	I agree	I agree	I agree	I agree	I absolutely agree.	I completely disagree.	I absolutely agree.	I absolutely agree.	I absolutely agree.	I agree	I agree	I agree	I completely disagree.	I'm undecided.	I agree
2025-05-26 21:11:35	Woman	29	Bachelor’s Master’s degree	Biotechnology - 3rd Year	Konya	Yes, I use it.	Yes, I use it.	ChatGPT	Yes, I use it.	Midjourney, Dal-E	Yes, I use it.	Elevenlabs	5	I use it very often.	I use it occasionally.	I use it occasionally.	I never use it.	I never use it.	I rarely use it.	I use it frequently.	I use it occasionally.	I never use it.	I never use it.	I never use it.	I never use it.	Today	5	40 USD	Education/Learning, Content Creation (text, visuals, audio), Business/Professional Purposes, Daily Tasks (calendar, email, suggestions, etc.)	I have an intermediate level of proficiency.	Important	I absolutely agree.	I'm undecided.	I agree	I absolutely agree.	I agree	I absolutely agree.	I'm undecided.	I'm undecided.	I'm undecided.	I'm undecided.	I absolutely agree.	I absolutely agree.	I absolutely agree.	I absolutely agree.	I absolutely agree.	I absolutely agree.	I agree	I'm undecided.
2025-05-26 21:14:21	Woman	30	Doctoral degree	Immunology - 5th Year Doctoral Thesis Period	Konya	Yes, I use it.	Yes, I use it.	ChatGPT, Gemini, Copilot	No, I don't use it.		No, I don't use it.		4	I use it frequently.	I use it occasionally.	I never use it.	I never use it.	I use it occasionally.	I never use it.	I never use it.	I never use it.	I never use it.	I never use it.	I never use it.	I never use it.	In the last week	1	-	Education/Learning, Content Creation (text, visuals, audio), Business/Professional Purposes, Daily Tasks (calendar, email, suggestions, etc.), Entertainment	I have some competence.	Important	I'm undecided.	I'm undecided.	I agree	I agree	I agree	I agree	I agree	I agree	I disagree.	I absolutely agree.	I absolutely agree.	I absolutely agree.	I agree	I absolutely agree.	I agree	I'm undecided.	I agree	I agree
2025-05-26 21:35:30	Male	25	Bachelor’s Master’s degree	Mechanical Engineering - 4th year	Konya	Yes, I use it.	Yes, I use it.	ChatGPT, Gemini	Yes, I use it.	Midjourney, Dall-E, Leonardo.ai, Runway ML, Sora, Kling	No, I don't use it.		4	I use it frequently.	I use it occasionally.	I never use it.	I never use it.	I never use it.	I never use it.	I use it occasionally.	I use it occasionally.	I never use it.	I rarely use it.	I use it occasionally.	I use it occasionally.	Today	3	30 USD	Education/Learning, Content Creation (text, visuals, audio), Business/Professional Purposes, Daily Tasks (calendar, email, suggestions, etc.), Entertainment	I have an intermediate level of proficiency.	Important	I absolutely agree.	I absolutely agree.	I absolutely agree.	I absolutely agree.	I absolutely agree.	I absolutely agree.	I absolutely agree.	I disagree.	I agree	I'm undecided.	I absolutely agree.	I absolutely agree.	I absolutely agree.	I absolutely agree.	I absolutely agree.	I absolutely agree.	I absolutely agree.	I absolutely agree.
2025-05-26 21:54:37	Male	26	Master’s degree	Molecular Biology and Genetics - Year 2	Konya	Yes, I use it.	Yes, I use it.	ChatGPT, Gemini, DeepSeek, Grok	Yes, I use it.	Midjourney, Dall-E, Leonardo.ai, Sora	Yes, I use it.	Elevenlabs	5	I use it very often.	I use it very often.	I use it frequently.	I use it occasionally.	I never use it.	I never use it.	I use it frequently.	I rarely use it.	I never use it.	I never use it.	I use it occasionally.	I never use it.	Today	3	20 USD.	Education/Learning, Content Creation (text, visuals, audio), Daily Tasks (calendar, email, suggestions, etc.)	I am competent	Moderately important	I absolutely agree.	I'm undecided.	I agree	I absolutely agree.	I absolutely agree.	I absolutely agree.	I absolutely agree.	I absolutely agree.	I completely disagree.	I absolutely agree.	I agree	I agree	I agree	I agree	I absolutely agree.	I'm undecided.	I'm undecided.	I agree
2025-05-26 22:06:16	Woman	23	Bachelor’s Master’s degree	Graphic Design 4th Year	Konya	Yes, I use it.	Yes, I use it.	ChatGPT, Grok, Copilot	Yes, I use it.	Ideogram	Yes, I use it.	Elevenlabs	5	I use it frequently.	I rarely use it.		I rarely use it.	I use it very often.								Today	1		Education/Learning, Content Creation (text, visual, audio), Business/Professional Purposes, Entertainment	I have an intermediate level of proficiency.	Important	I agree	I agree	I agree	I agree	I'm undecided.	I agree	I agree	I agree	I disagree.	I absolutely agree.	I agree	I agree	I agree	I agree	I absolutely agree.	I'm undecided.	I'm undecided.	I'm undecided.
2025-05-26 22:12:58	Woman	33	Master’s degree	Graphics Master's Master’s degree	Konya	Yes, I use it.	Yes, I use it.	ChatGPT	No, I don't use it.		No, I don't use it.		5	I use it very often.	I use it occasionally.	I never use it.	I never use it.	I never use it.	I never use it.	I rarely use it.	I never use it.	I never use it.	I never use it.	I never use it.	I never use it.	Today	3	20 USD	Education/Learning, Content Creation (text, visuals, audio), Business/Professional Purposes, Daily Tasks (calendar, email, suggestions, etc.), Entertainment	I am competent	Important	I agree	I agree	I agree	I agree	I agree	I agree	I agree	I agree	I completely disagree.	I agree	I agree	I agree	I agree	I disagree.	I agree	I'm undecided.	I agree	I agree
2025-05-26 22:15:47	Woman	25	Master’s degree	Radio Television	Ankara	Yes, I use it.	Yes, I use it.	ChatGPT, Gemini	No, I don't use it.		No, I don't use it.		2	I rarely use it.	I rarely use it.	I never use it.	I never use it.	I never use it.	I never use it.	I never use it.	I never use it.	I never use it.	I never use it.	I never use it.	I never use it.	In the last month	1	I'm not paying.	Content Creation (text, visuals, audio), Business/Professional Purposes	I have an intermediate level of proficiency.	It doesn't matter at all.	I agree	I agree	I agree	I agree	I agree	I agree	I agree	I agree	I completely disagree.	I'm undecided.	I completely disagree.	I agree	I'm undecided.	I'm undecided.	I'm undecided.	I'm undecided.	I'm undecided.	I'm undecided.
2025-05-26 22:32:15	Woman	26	Master’s degree	Radio, Television and Cinema Department, 2nd Year	Ankara	Yes, I use it.	Yes, I use it.	ChatGPT, DeepSeek	Yes, I use it.	Runway ML, Sora, Kling, ltx studio	No, I don't use it.		3	I use it very often.	I use it occasionally.	I use it frequently.	I never use it.	I never use it.	I never use it.	I rarely use it.	I never use it.	I never use it.	I use it frequently.	I use it frequently.	I use it frequently.	Today	3	50 USD	Education/Learning, Work/Professional Purposes	I am very competent.	Moderately important	I absolutely agree.	I absolutely agree.	I absolutely agree.	I agree	I absolutely agree.	I absolutely agree.	I absolutely agree.	I agree	I'm undecided.	I agree	I'm undecided.	I'm undecided.	I disagree.	I disagree.	I'm undecided.	I disagree.	I agree	I'm undecided.
2025-05-26 23:04:23	Woman	30	Bachelor’s Master’s degree			Yes, I use it.	Yes, I use it.	ChatGPT	No, I don't use it.		No, I don't use it.		4	I use it very often.	I rarely use it.	I never use it.	I never use it.	I never use it.	I never use it.	I never use it.	I never use it.	I never use it.	I never use it.	I never use it.	I never use it.	Today	1		Education/Learning, Content Creation (text, visuals, audio), Daily Tasks (calendar, email, suggestions, etc.)	I have an intermediate level of proficiency.	Important	I agree	I'm undecided.	I absolutely agree.	I absolutely agree.	I'm undecided.	I agree	I absolutely agree.	I agree	I agree	I disagree.	I absolutely agree.	I absolutely agree.	I agree	I'm undecided.	I absolutely agree.	I agree	I agree	I agree
2025-05-26 23:20:40	Woman	35	Bachelor’s Master’s degree		Konya	Yes, I use it.	Yes, I use it.	ChatGPT	No, I don't use it.		No, I don't use it.		2	I use it occasionally.	I never use it.	I never use it.	I never use it.	I never use it.	I never use it.	I never use it.	I never use it.	I never use it.	I never use it.	I never use it.	I never use it.	In the last week	1		Education/Learning, Work/Professional Purposes, Daily Tasks (calendar, email, suggestions, etc.)	I have some competence.	It doesn't matter at all.	I agree	I agree	I agree	I agree	I agree	I agree	I agree	I agree	I agree	I agree	I agree	I agree	I agree	I agree	I agree	I agree	I agree	I agree
2025-05-26 23:29:08	Male	27	Bachelor’s Master’s degree			Yes, I use it.	Yes, I use it.	ChatGPT, Gemini, Copilot	Yes, I use it.	Runway ML, Sora, Kling	Yes, I use it.	Elevenlabs	4	I use it very often.	I rarely use it.	I rarely use it.	I rarely use it.	I rarely use it.	I never use it.	I never use it.	I never use it.	I never use it.	I rarely use it.	I use it occasionally.	I rarely use it.	Today	1	0	Education/Learning, Content Creation (text, visuals, audio), Business/Professional Purposes, Daily Tasks (calendar, email, suggestions, etc.), Entertainment	I am competent	Important	I agree	I'm undecided.	I agree	I agree	I agree	I agree	I agree	I disagree.	I agree	I disagree.	I agree	I absolutely agree.	I absolutely agree.	I agree	I agree	I absolutely agree.	I agree	I'm undecided.
2025-05-26 23:36:59	Male	30	Master’s degree	Radio, Television and Cinema, 2nd year (Master's Master’s degree)	Kayseri	Yes, I use it.	Yes, I use it.	ChatGPT, Gemini, DeepSeek, Grok	Yes, I use it.	Midjourney, Runway ML, Sora	Yes, I use it.	Elevenlabs	4	I use it frequently.	I use it occasionally.	I use it occasionally.	I use it occasionally.	I rarely use it.	I rarely use it.	I use it occasionally.	I use it occasionally.	I use it occasionally.	I use it occasionally.	I use it occasionally.	I use it occasionally.	Today	1	0	Education/Learning, Content Creation (text, visual, audio), Business/Professional Purposes	I have some competence.	Important	I agree	I agree	I agree	I agree	I agree	I agree	I agree	I agree	I disagree.	I agree	I agree	I agree	I agree	I agree	I agree	I agree	I agree	I agree
2025-05-27 00:15:36	Woman	21	Bachelor’s Master’s degree	Sports Management, 2nd Year	Ankara	Yes, I use it.	Yes, I use it.	ChatGPT	No, I don't use it.		No, I don't use it.		3	I use it very often.	I never use it.	I never use it.	I never use it.	I never use it.	I never use it.	I never use it.	I never use it.	I never use it.	I never use it.	I never use it.	I never use it.	Today	3	0 TL	Education/Learning, Entertainment	I am competent	Indispensable	I agree	I agree	I agree	I agree	I agree	I agree	I agree	I agree	I agree	I agree	I absolutely agree.	I absolutely agree.	I absolutely agree.	I absolutely agree.	I absolutely agree.	I absolutely agree.	I absolutely agree.	I absolutely agree.
2025-05-27 00:33:35	Male	24	Bachelor’s Master’s degree	Recreation - 4th Grade	Ankara	Yes, I use it.	Yes, I use it.	Gemini	No, I don't use it.		No, I don't use it.		5	I use it very often.	I never use it.	I never use it.	I use it occasionally.	I use it occasionally.	I never use it.	I never use it.	I never use it.	I never use it.	I never use it.	I never use it.	I never use it.	Today	1	0	Education/Learning, Content Creation (text, visuals, audio)	I have some competence.	Moderately important	I absolutely agree.	I absolutely agree.	I'm undecided.	I absolutely agree.	I'm undecided.	I agree	I'm undecided.	I agree	I agree	I agree	I absolutely agree.	I absolutely agree.	I absolutely agree.	I absolutely agree.	I absolutely agree.	I absolutely agree.	I absolutely agree.	I absolutely agree.
2025-05-27 00:43:37	Woman	26	Master’s degree	Audiology	Ankara	Yes, I use it.	Yes, I use it.	ChatGPT	Yes, I use it.	Midjourney, Dal-E	No, I don't use it.		4	I use it frequently.	I never use it.	I never use it.	I never use it.	I never use it.	I never use it.	I rarely use it.	I rarely use it.	I never use it.	I never use it.	I never use it.	I never use it.	In the last week	1	I'm using the free version.	Education/Learning, Content Creation (text, visual, audio), Business/Professional Purposes	I have some competence.	Moderately important	I agree	I agree	I agree	I absolutely agree.	I'm undecided.	I agree	I'm undecided.	I'm undecided.	I'm undecided.	I agree	I agree	I agree	I agree	I'm undecided.	I absolutely agree.	I agree	I agree	I absolutely agree.
2025-05-27 08:04:10	Woman	26	Bachelor’s Master’s degree		Ankara	No, I don't use it.
2025-05-27 09:19:56	Woman	31	Bachelor’s Master’s degree		Konya	Yes, I use it.	Yes, I use it.	ChatGPT, DeepSeek, Grok	Yes, I use it.	Midjourney, Leonardo.ai, Runway ML,	Yes, I use it.	Elevenlabs, MMAudio	3	I use it occasionally.	I rarely use it.	I use it occasionally.	I use it occasionally.	I rarely use it.		I rarely use it.	I never use it.	I never use it.	I rarely use it.	I never use it.	I use it occasionally.	Today	5	15 - 70 USD	Content Creation (text, visuals, audio), Entertainment	I have an intermediate level of proficiency.	Moderately important	I disagree.	I agree	I absolutely agree.	I absolutely agree.	I absolutely agree.	I agree	I agree	I'm undecided.	I agree	I absolutely agree.	I agree	I absolutely agree.	I absolutely agree.	I'm undecided.	I absolutely agree.	I'm undecided.	I absolutely agree.	I absolutely agree.
2025-05-27 09:44:42	Woman	25	Master’s degree	Food Engineering - 3rd Year Graduate	Istanbul	Yes, I use it.	Yes, I use it.	ChatGPT, Gemini, DeepSeek	No, I don't use it.		No, I don't use it.		5	I use it occasionally.	I use it occasionally.	I never use it.		I never use it.	I never use it.	I never use it.	I never use it.	I never use it.	I never use it.	I never use it.	I never use it.	Today	1	0	Education/Learning, Content Creation (text, visuals, audio), Business/Professional Purposes, Daily Tasks (calendar, email, suggestions, etc.)	I have an intermediate level of proficiency.	Important	I agree	I completely disagree.	I absolutely agree.	I absolutely agree.	I disagree.	I'm undecided.	I absolutely agree.	I'm undecided.	I agree	I disagree.	I absolutely agree.	I absolutely agree.	I agree	I disagree.	I absolutely agree.	I absolutely agree.	I absolutely agree.	I absolutely agree.
2025-05-27 09:49:35	Woman	22	Bachelor’s Master’s degree	recreation 4	Konya	No, I don't use it.
2025-05-27 09:56:21	Woman	23	Bachelor’s Master’s degree	History Graduate	Konya	Yes, I use it.	Yes, I use it.	ChatGPT	No, I don't use it.		No, I don't use it.		2	I use it occasionally.	I never use it.	I never use it.	I never use it.	I never use it.	I never use it.	I never use it.	I never use it.	I never use it.	I never use it.	I never use it.	I never use it.	In the last week	1	-	Entertainment	I have an intermediate level of proficiency.	It's not very important.	I agree	I agree	I'm undecided.	I agree	I agree	I agree	I agree	I agree	I agree	I agree	I agree	I agree	I agree	I agree	I'm undecided.	I'm undecided.	I agree	I agree
2025-05-27 10:25:44	Male	37	Bachelor’s Master’s degree	BUSINESS	Konya	Yes, I use it.	Yes, I use it.	ChatGPT	No, I don't use it.		No, I don't use it.		3	I use it frequently.	I never use it.	I never use it.	I never use it.	I never use it.	I never use it.	I never use it.	I never use it.	I never use it.	I never use it.	I never use it.	I never use it.	In the last week	1	I'M USING THE FREE PART.	Business/Professional Purposes	I have an intermediate level of proficiency.	It's not very important.	I'm undecided.	I'm undecided.	I completely disagree.	I agree	I agree	I agree	I agree	I agree	I agree	I agree	I agree	I agree	I agree	I agree	I absolutely agree.	I'm undecided.	I agree	I agree
2025-05-27 11:29:57	Male	27	Bachelor’s Master’s degree	Radio, Television and Cinema	Ankara	Yes, I use it.	Yes, I use it.	ChatGPT	No, I don't use it.		No, I don't use it.		1	I use it occasionally.	I never use it.	I never use it.	I never use it.	I never use it.	I never use it.	I never use it.	I never use it.	I never use it.	I never use it.	I never use it.	I never use it.	In the last week	1	500 TL	Education / Learning	I have an intermediate level of proficiency.	Moderately important	I agree	I'm undecided.	I'm undecided.	I disagree.	I disagree.	I disagree.	I'm undecided.	I'm undecided.	I'm undecided.	I disagree.	I agree	I agree	I agree	I'm undecided.	I agree	I'm undecided.	I agree	I agree
2025-05-27 11:49:46	Woman	27	Bachelor’s Master’s degree	Radio, television and film graduate	Eskisehir	Yes, I use it.	Yes, I use it.	ChatGPT, Gemini	No, I don't use it.		No, I don't use it.		3	I use it frequently.	I use it frequently.	I rarely use it.	I never use it.	I never use it.	I never use it.	I never use it.	I never use it.	I never use it.	I never use it.	I never use it.	I never use it.	In the last week	1		Education/Learning, Content Creation (text, visuals, audio), Business/Professional Purposes, Daily Tasks (calendar, email, suggestions, etc.), Entertainment	I am competent	Moderately important	I agree	I agree	I agree	I agree	I agree	I agree	I agree	I agree	I disagree.	I agree	I agree	I agree	I'm undecided.	I agree	I agree	I'm undecided.	I'm undecided.	I'm undecided.
2025-05-27 11:54:57	Male	32	Bachelor’s Master’s degree	Environmental engineering	Konya	No, I don't use it.
2025-05-27 13:35:16	Woman	55	Bachelor’s Master’s degree	Faculty of Education	Antalya	No, I don't use it.
2025-05-27 13:48:58	Woman	21	Bachelor’s Master’s degree	Graphics, 3rd grade	Konya	Yes, I use it.	Yes, I use it.	ChatGPT, Copilot	Yes, I use it.	Dall-E, Leonardo.ai,	No, I don't use it.		4	I use it occasionally.	I never use it.	I rarely use it.	I never use it.	I use it occasionally.	I never use it.	I rarely use it.	I rarely use it.	I never use it.	I never use it.	I never use it.	I never use it.	In the last week	1		Business/Professional Purposes, Entertainment	I have an intermediate level of proficiency.	Important	I agree	I agree	I agree	I agree	I agree	I agree	I agree	I agree	I completely disagree.	I absolutely agree.	I agree	I agree	I agree	I'm undecided.	I agree	I'm undecided.	I agree	I agree
2025-05-27 14:09:00	Woman	26	Bachelor’s Master’s degree	Graduate	Konya	Yes, I use it.	Yes, I use it.	ChatGPT, Gemini	No, I don't use it.		No, I don't use it.		3	I use it frequently.	I use it frequently.											Today	1	I'm not paying	Education/Learning, Content Creation (text, visuals, audio), Business/Professional Purposes, Daily Tasks (calendar, email, suggestions, etc.)	I have some competence.	Moderately important	I agree	I agree	I agree	I agree	I agree	I agree	I absolutely agree.	I agree	I'm undecided.	I'm undecided.	I agree	I agree	I'm undecided.	I agree	I agree	I'm undecided.	I agree	I'm undecided.
2025-05-27 14:22:01	Woman	45	Bachelor’s Master’s degree	Graphics Master's Program, 2nd Year	Konya	Yes, I use it.	Yes, I use it.	ChatGPT, Gemini, Copilot	No, I don't use it.		No, I don't use it.		3	I use it frequently.	I use it frequently.	I rarely use it.	I never use it.	I use it frequently.	I never use it.	I rarely use it.	I never use it.	I never use it.	I never use it.	I never use it.	I never use it.	In the last week	1	I'm using the free option.	Education/Learning, Content Creation (text, visuals, audio)	I have an intermediate level of proficiency.	Moderately important	I agree	I agree	I'm undecided.	I agree	I'm undecided.	I'm undecided.	I'm undecided.	I agree	I agree	I agree	I agree	I agree	I agree	I agree	I agree	I'm undecided.	I agree	I'm undecided.
2025-05-27 14:31:04	Woman	21	Bachelor’s Master’s degree	Dietetics 2nd Year	Konya	Yes, I use it.	Yes, I use it.	ChatGPT, Gemini	No, I don't use it.		No, I don't use it.		5	I use it very often.	I use it frequently.	I rarely use it.	I rarely use it.	I use it occasionally.	I rarely use it.	I rarely use it.	I rarely use it.	I never use it.	I never use it.	I never use it.	I never use it.	Today	1	I didn't use it for a fee.	Education/Learning, Work/Professional Purposes, Daily Tasks (calendar, email, suggestions, etc.), Entertainment	I have some competence.	Moderately important	I agree	I'm undecided.	I agree	I agree	I'm undecided.	I agree	I agree	I'm undecided.	I disagree.	I agree	I agree	I agree	I agree	I agree	I agree	I'm undecided.	I agree	I'm undecided.
2025-05-27 14:33:20	Woman	31	Bachelor’s Master’s degree	History teacher - graduate	Konya	Yes, I use it.	Yes, I use it.	ChatGPT	No, I don't use it.		No, I don't use it.		5	I use it very often.	I never use it.	I never use it.	I never use it.	I never use it.	I never use it.	I never use it.	I never use it.	I never use it.	I never use it.	I never use it.	I never use it.	In the last week	1	None	Content Creation (text, visuals, audio), Daily Tasks (calendar, email, recommendations, etc.), Entertainment	I have some competence.	Moderately important	I completely disagree.	I completely disagree.	I disagree.	I disagree.	I disagree.	I disagree.	I disagree.	I disagree.	I completely disagree.	I disagree.	I disagree.	I disagree.	I disagree.	I disagree.	I disagree.	I completely disagree.	I disagree.	I disagree.
2025-05-27 14:33:27	Woman	60	Doctoral degree	English	Istanbul	No, I don't use it.
2025-05-27 14:38:05	Woman	24	Master’s degree	Graphic Design - Master's Master’s degree 2	Konya	Yes, I use it.	Yes, I use it.	ChatGPT	No, I don't use it.		No, I don't use it.		2	I use it occasionally.	I never use it.	I never use it.	I never use it.	I never use it.	I never use it.	I never use it.	I never use it.	I never use it.	I never use it.	I never use it.	I never use it.	In the last week	1	0	Education/Learning, Content Creation (text, visuals, audio), Business/Professional Purposes, Daily Tasks (calendar, email, suggestions, etc.), Entertainment	I have some competence.	Moderately important	I'm undecided.	I absolutely agree.	I agree	I agree	I agree	I agree	I agree	I agree	I'm undecided.	I'm undecided.	I agree	I agree	I agree	I agree	I agree	I'm undecided.	I agree	I agree
2025-05-27 15:21:52	Woman	25	Bachelor’s Master’s degree	Banking and insurance	Konya	Yes, I use it.	Yes, I use it.	ChatGPT, Gemini, DeepSeek	No, I don't use it.		Yes, I use it.	Elevenlabs	2	I use it occasionally.		I use it occasionally.	I rarely use it.	I use it occasionally.	I use it occasionally.			I use it frequently.	I use it very often.		I use it frequently.	In the last week	1	300 TL	Content Creation (text, visuals, audio)	I have an intermediate level of proficiency.	Moderately important	I'm undecided.	I'm undecided.	I'm undecided.	I'm undecided.	I'm undecided.	I'm undecided.	I'm undecided.	I disagree.	I'm undecided.	I'm undecided.	I'm undecided.	I'm undecided.	I'm undecided.	I'm undecided.	I'm undecided.	I'm undecided.	I absolutely agree.	I disagree.
2025-05-27 15:50:50	Woman	43	Bachelor’s Master’s degree			Yes, I use it.	Yes, I use it.	ChatGPT, Gemini, Grok	No, I don't use it.		No, I don't use it.		2	I use it occasionally.	I rarely use it.		I rarely use it.									In the last week	1		Business/Professional Purposes	I don't feel competent at all.	It's not very important.	I completely disagree.	I completely disagree.	I completely disagree.	I disagree.	I disagree.	I disagree.	I disagree.	I absolutely agree.	I absolutely agree.	I disagree.	I'm undecided.	I'm undecided.	I'm undecided.	I agree	I agree	I'm undecided.	I agree	I agree
2025-05-27 17:23:54	Woman	26	Master’s degree	Chart	Konya	Yes, I use it.	No, I don't use it.		No, I don't use it.		No, I don't use it.		1	I use it occasionally.												In the last week	1	0	Education / Learning	I don't feel competent at all.	It doesn't matter at all.	I completely disagree.	I completely disagree.	I completely disagree.	I completely disagree.	I completely disagree.	I completely disagree.	I completely disagree.	I completely disagree.	I completely disagree.	I completely disagree.	I completely disagree.	I completely disagree.	I completely disagree.	I completely disagree.	I completely disagree.	I completely disagree.	I completely disagree.	I completely disagree.
2025-05-27 17:39:23	Woman	24	Bachelor’s Master’s degree		Konya	No, I don't use it.
2025-05-27 23:13:10	Male	28	Bachelor’s Master’s degree			Yes, I use it.	Yes, I use it.	ChatGPT, DeepSeek	No, I don't use it.		No, I don't use it.		4	I use it frequently.	I never use it.	I rarely use it.	I never use it.	I never use it.	I never use it.	I never use it.	I never use it.	I never use it.	I never use it.	I never use it.	I never use it.	Today	5	700 TL	Education/Learning, Content Creation (text, visuals, audio), Business/Professional Purposes, Daily Tasks (calendar, email, suggestions, etc.)	I have an intermediate level of proficiency.	Important	I'm undecided.	I'm undecided.	I agree	I agree	I agree	I agree	I'm undecided.	I agree	I disagree.	I'm undecided.	I agree	I agree	I agree	I agree	I agree	I'm undecided.	I agree	I agree
2025-05-28 08:41:20	Woman	40	Bachelor’s Master’s degree	graphic design	Denizli	Yes, I use it.	Yes, I use it.	ChatGPT	No, I don't use it.		No, I don't use it.		2	I use it occasionally.												In the last week	1	0	Education/Learning, Content Creation (text, visuals, audio), field trip planning.	I have some competence.	Moderately important	I completely disagree.	I disagree.	I disagree.	I completely disagree.	I completely disagree.	I completely disagree.	I completely disagree.	I completely disagree.	I disagree.	I completely disagree.	I disagree.	I completely disagree.	I disagree.	I completely disagree.	I completely disagree.	I disagree.	I completely disagree.	I completely disagree.
2025-05-28 08:54:44	Woman	29	Master’s degree	International Trade and Finance - Graduate	Denizli	Yes, I use it.	Yes, I use it.	ChatGPT, Gemini, Grok, Copilot	No, I don't use it.		No, I don't use it.		3	I use it very often.	I use it very often.	I never use it.	I use it frequently.	I rarely use it.	I never use it.	I rarely use it.	I never use it.	I never use it.	I never use it.	I never use it.	I never use it.	In the last week	2	400	Education/Learning, Content Creation (text, visual, audio), Business/Professional Purposes, Entertainment	I have some competence.	It's not very important.	I agree	I'm undecided.	I agree	I agree	I agree	I disagree.	I'm undecided.	I'm undecided.	I disagree.	I'm undecided.	I agree	I agree	I agree	I absolutely agree.	I agree	I agree	I absolutely agree.	I absolutely agree.
2025-05-28 09:16:04	Male	18	Bachelor’s Master’s degree	Graphic Design 2nd Year	DENIZLI	Yes, I use it.	Yes, I use it.	ChatGPT, DeepSeek, Copilot, MIDJOURNEY, Ideogram, Adobe Fire Fly Etc.	Yes, I use it.	Midjourney, Dall-E, Leonardo.ai, Sora, Kling, Ideogram. It's a shame you didn't include them in the options.	No, I don't use it.		5	I use it occasionally.	I never use it.	I use it occasionally.	I rarely use it.	I use it occasionally.	I rarely use it.	I use it occasionally.	I use it occasionally.	I never use it.	I use it occasionally.	I use it occasionally.	I never use it.	Today	3	15 USD	Education/Learning, Content Creation (text, visuals, audio), Business/Professional Purposes, Daily Tasks (calendar, email, suggestions, etc.), Entertainment	I am very competent.	Indispensable	I absolutely agree.	I absolutely agree.	I absolutely agree.	I absolutely agree.	I absolutely agree.	I absolutely agree.	I absolutely agree.	I disagree.	I'm undecided.	I completely disagree.	I absolutely agree.	I absolutely agree.	I absolutely agree.	I absolutely agree.	I absolutely agree.	I agree	I absolutely agree.	I absolutely agree.
2025-05-28 09:20:20	Woman	18	Bachelor’s Master’s degree	Graphic Design 1st Year	Mardin	Yes, I use it.	Yes, I use it.	ChatGPT	No, I don't use it.		Yes, I use it.	Suno	5	I use it very often.	I use it occasionally.	I use it frequently.	I never use it.	I use it occasionally.	I never use it.	I never use it.	I never use it.	I never use it.	I never use it.	I use it occasionally.	I never use it.	Today	1	150 TL	Education/Learning, Content Creation (text, visual, audio), Business/Professional Purposes	I am competent	Important	I'm undecided.	I agree	I agree	I absolutely agree.	I absolutely agree.	I absolutely agree.	I absolutely agree.	I absolutely agree.	I completely disagree.	I absolutely agree.	I absolutely agree.	I absolutely agree.	I agree	I'm undecided.	I absolutely agree.	I'm undecided.	I agree	I agree
2025-05-28 10:05:14	Woman	19	Bachelor’s Master’s degree	Graphic Design 1st Year	Denizli	Yes, I use it.	Yes, I use it.	ChatGPT	No, I don't use it.		No, I don't use it.		4	I use it frequently.	I never use it.	I never use it.	I never use it.	I never use it.	I never use it.	I never use it.	I never use it.	I never use it.	I never use it.	I never use it.	I never use it.	In the last week	1	I'm not paying	Content Creation (text, visuals, audio)	I am competent	Moderately important	I agree	I disagree.	I'm undecided.	I agree	I disagree.	I agree	I disagree.	I agree	I completely disagree.	I agree	I agree	I agree	I agree	I agree	I agree	I disagree.	I agree	I agree
2025-05-28 11:13:44	Woman	18	Bachelor’s Master’s degree	Graphic Design 1st Year	Izmir	Yes, I use it.	Yes, I use it.	ChatGPT, Gemini, DeepSeek	Yes, I use it.	Midjourney	No, I don't use it.		3	I use it very often.	I use it frequently.	I use it frequently.	I never use it.	I never use it.	I never use it.	I use it occasionally.	I never use it.	I never use it.	I never use it.	I never use it.	I never use it.	In the last week	1	0 TL	Education/Learning, Content Creation (text, visuals, audio)	I have an intermediate level of proficiency.	Important	I agree	I'm undecided.	I agree	I absolutely agree.	I agree	I agree	I agree	I agree	I'm undecided.	I agree	I'm undecided.	I agree	I agree	I agree	I absolutely agree.	I'm undecided.	I agree	I'm undecided.
2025-05-28 11:16:14	Woman	29	Doctoral degree	Philosophy and Religious Studies - 1st Year	Denizli	Yes, I use it.	Yes, I use it.	ChatGPT, DeepSeek	Yes, I use it.	Sora	No, I don't use it.		5	I use it very often.	I rarely use it.	I use it frequently.	I never use it.	I use it occasionally.	I never use it.	I never use it.	I never use it.	I never use it.	I never use it.	I use it frequently.	I never use it.	In the last week	1	0	Education / Learning	I have an intermediate level of proficiency.	Important	I disagree.	I completely disagree.	I absolutely agree.	I agree	I'm undecided.	I absolutely agree.	I agree	I agree	I completely disagree.	I disagree.	I absolutely agree.	I absolutely agree.	I absolutely agree.	I absolutely agree.	I absolutely agree.	I absolutely agree.	I absolutely agree.	I absolutely agree.
2025-05-28 11:40:27	Male	19	Bachelor’s Master’s degree	Graphic Design	Denizli	Yes, I use it.	Yes, I use it.	ChatGPT, Grok, Copilot	No, I don't use it.		Yes, I use it.	Elevenlabs	3	I use it frequently.	I never use it.	I never use it.	I use it occasionally.	I use it occasionally.	I never use it.	I never use it.	I use it frequently.	I never use it.	I never use it.	I never use it.	I never use it.	In the last week	1	0 TL	Education/Learning, Content Creation (text, visuals, audio), Business/Professional Purposes, Daily Tasks (calendar, email, suggestions, etc.), Entertainment	I have an intermediate level of proficiency.	Moderately important	I agree	I'm undecided.	I'm undecided.	I'm undecided.	I'm undecided.	I'm undecided.	I'm undecided.	I'm undecided.	I'm undecided.	I'm undecided.	I agree	I agree	I agree	I agree	I agree	I agree	I agree	I agree
2025-05-28 11:43:07	Woman	20	Bachelor’s Master’s degree	Graphic design	Mardin	Yes, I use it.	No, I don't use it.		No, I don't use it.		No, I don't use it.		5	I use it very often.	I never use it.	I use it frequently.	I never use it.	I use it occasionally.	I never use it.	I never use it.	I never use it.	I never use it.	I never use it.	I never use it.	I never use it.	Today	1		Education/Learning, Content Creation (text, visual, audio), Business/Professional Purposes	I have an intermediate level of proficiency.	Indispensable	I'm undecided.	I disagree.	I disagree.	I'm undecided.	I agree	I agree	I agree	I'm undecided.	I disagree.	I agree	I absolutely agree.	I absolutely agree.	I absolutely agree.	I agree	I agree	I'm undecided.	I agree	I'm undecided.
2025-05-28 12:07:56	Woman	19	Bachelor’s Master’s degree	Graphic Design 1st Year	Denizli	Yes, I use it.	Yes, I use it.	ChatGPT	No, I don't use it.		No, I don't use it.		4	I use it frequently.	I never use it.	I never use it.	I never use it.	I never use it.	I never use it.	I never use it.	I never use it.	I never use it.	I never use it.	I never use it.	I never use it.	Today	1	0 TL	Education / Learning	I am competent	It's not very important.	I agree	I agree	I completely disagree.	I agree	I completely disagree.	I completely disagree.	I completely disagree.	I completely disagree.	I completely disagree.	I completely disagree.	I'm undecided.	I absolutely agree.	I'm undecided.	I'm undecided.	I agree	I'm undecided.	I'm undecided.	I agree
2025-05-28 12:27:30	Woman	33	Master’s degree			Yes, I use it.	Yes, I use it.	ChatGPT	No, I don't use it.		No, I don't use it.		2	I rarely use it.												In the last week	1		Education / Learning	I have an intermediate level of proficiency.	It's not very important.	I disagree.	I disagree.	I'm undecided.	I agree	I agree	I agree	I agree	I agree	I'm undecided.	I agree	I'm undecided.	I agree	I agree	I agree	I agree	I'm undecided.	I agree	I agree
2025-05-28 12:46:34	Male	21	Bachelor’s Master’s degree	Graphic Design - 2nd Year	Denizli	Yes, I use it.	Yes, I use it.	ChatGPT	No, I don't use it.		No, I don't use it.		2	I use it occasionally.	I never use it.	I never use it.	I never use it.	I never use it.	I never use it.	I never use it.	I never use it.	I never use it.	I never use it.	I never use it.	I never use it.	In the last month	1		Business/Professional Purposes	I have some competence.	It's not very important.	I agree	I'm undecided.	I'm undecided.	I agree	I'm undecided.	I agree	I'm undecided.	I completely disagree.	I completely disagree.	I disagree.	I completely disagree.	I disagree.	I disagree.	I disagree.	I completely disagree.	I disagree.	I completely disagree.	I disagree.
2025-05-29 09:38:31	Woman	24	Master’s degree	Labor economics and industrial relations - Master's Master’s degree	Kırklareli	Yes, I use it.	No, I don't use it.		No, I don't use it.		No, I don't use it.		2	I use it occasionally.	I never use it.	I never use it.	I never use it.	I never use it.	I never use it.	I never use it.	I never use it.	I never use it.	I never use it.	I never use it.	I never use it.	A long time ago	1	0	Education / Learning	I don't feel competent at all.	Moderately important	I agree	I disagree.	I agree	I agree	I agree	I agree	I'm undecided.	I agree	I disagree.	I agree	I disagree.	I agree	I agree	I agree	I agree	I'm undecided.	I agree	I'm undecided.
2025-05-29 10:12:23	Woman	30	Bachelor’s Master’s degree	Nursing graduate	Ankara	Yes, I use it.	Yes, I use it.	ChatGPT	No, I don't use it.		No, I don't use it.		2	I use it occasionally.	I never use it.	I never use it.	I never use it.	I never use it.	I never use it.	I never use it.	I never use it.	I never use it.	I never use it.	I never use it.	I never use it.	In the last month	1	0	Education/Learning, Work/Professional Purposes, Daily Tasks (calendar, email, suggestions, etc.), Entertainment	I don't feel competent at all.	It's not very important.	I disagree.	I completely disagree.	I disagree.	I disagree.	I'm undecided.	I'm undecided.	I disagree.	I agree	I disagree.	I agree	I disagree.	I agree	I agree	I'm undecided.	I agree	I'm undecided.	I agree	I'm undecided.
2025-06-03 18:32:21	Male	30	Doctoral degree	Medicine	Konya	Yes, I use it.	Yes, I use it.	ChatGPT	No, I don't use it.		No, I don't use it.		3	I use it frequently.	I rarely use it.	I never use it.	I never use it.	I never use it.	I never use it.	I never use it.	I never use it.	I never use it.	I never use it.	I never use it.	I never use it.	Today	4	20 USD	Education / Learning	I have some competence.	Moderately important	I'm undecided.	I agree	I agree	I agree	I agree	I agree	I agree	I agree	I agree	I agree	I agree	I agree	I agree	I agree	I agree	I agree	I agree	I agree
[truncated: 34 more columns]
